# Supplementary material
Source: publisher figshare collection journal article supplement (https://diabetesjournals.figshare.com/articles/dataset/_/28365386)

# Supplementary Figure 4

## Supplementary Figure 4: Effects of CANA treatment on the morphology of trabecular bone of the axial skeleton (lumbar vertebra-5, L5).

Trabecular bone morphology was assessed at the L5 body, excluding the cortical envelop. Parameters measured included A) bone volume per total volume (BV/TV), B) bone mineral density (BMD), C) trabecular thickness (Tb.Th), and D) trabecular number (Tb.N). Sample size as follows: Control (CTL) males at basal (6) 7, 9, and 12 months of age (1, 3, or 6 months (m) of treatment) basal n=18, n<sub>1m</sub>=20, n<sub>3m</sub>=23, n<sub>6m</sub>=25, basal females n=19, CTL females n<sub>1m</sub>=19, n<sub>3m</sub>=15, n<sub>6m</sub>=32, CANA-treated males n<sub>1m</sub>=20, n<sub>3m</sub>=30, n<sub>6m</sub>=29, CANA-treated females n<sub>1m</sub>=24, n<sub>3m</sub>=15, n<sub>6m</sub>=48. Descriptive statistics and multiple regression models are presented in Supplement table 5.

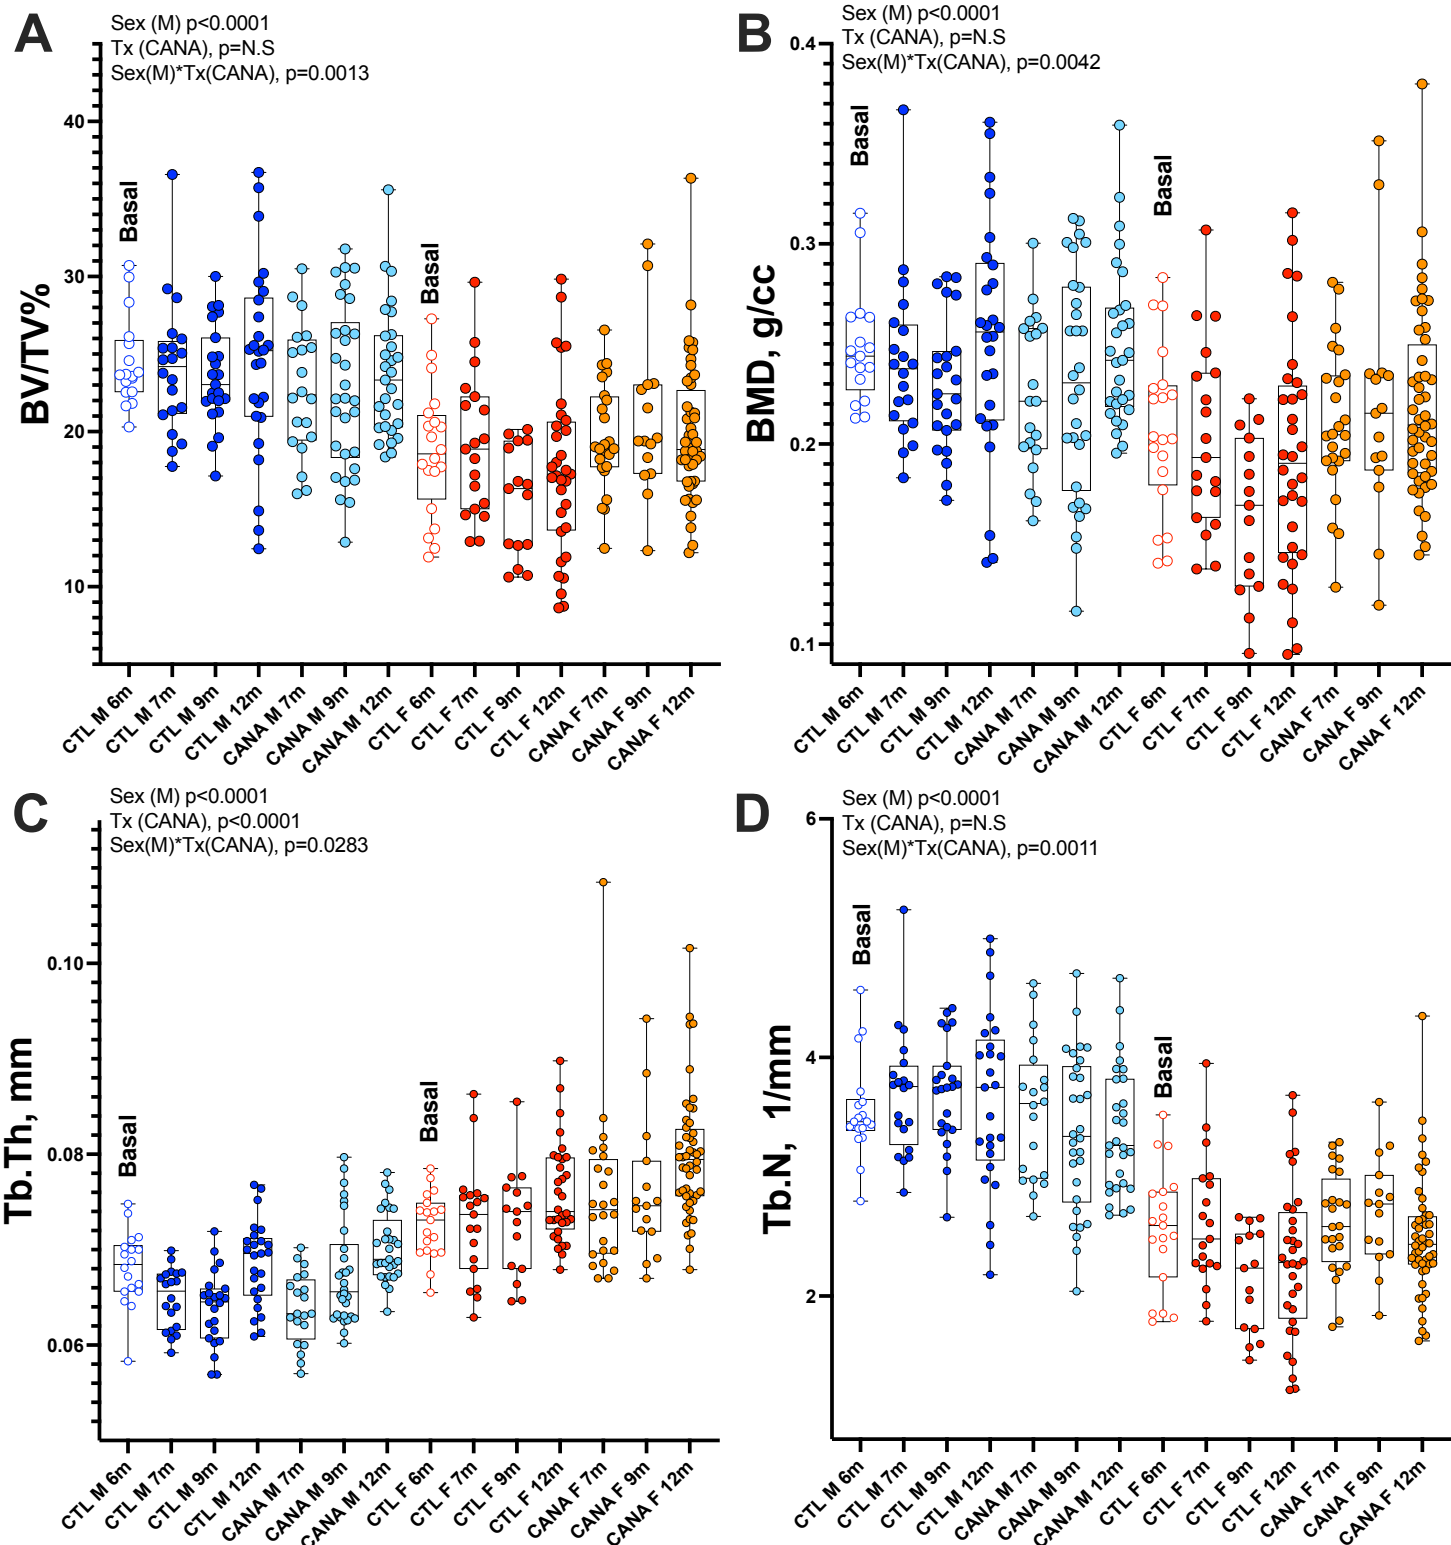

Supplement: Supplementary file 1 [file 1]
