# Supplementary material
Source: publisher figshare collection journal article supplement (https://diabetesjournals.figshare.com/articles/dataset/_/28365386)

Supplementary Figure 3

**Supplementary Figure 3: Effects of CANA treatment on the morphology of trabecular bone of the appendicular skeleton (femur distal metaphysis).** Trabecular bone morphology was assessed at the femur distal metaphysis. Parameters measured included A) bone volume per total volume (BV/TV), B) bone mineral density (BMD), C) trabecular thickness (Tb.Th), and D) trabecular number (Tb.N). Sample size as follows: Control (CTL) males at basal (6) 7, 9, and 12 months of age (1, 3, or 6 months (m) of treatment) basal  $n=18$ ,  $n_{1m}=20$ ,  $n_{3m}=23$ ,  $n_{6m}=20$ , basal females  $n=19$ , CTL females  $n_{1m}=19$ ,  $n_{3m}=15$ ,  $n_{6m}=30$ , CANA-treated males  $n_{1m}=20$ ,  $n_{3m}=30$ ,  $n_{6m}=22$ , CANA-treated females  $n_{1m}=24$ ,  $n_{3m}=15$ ,  $n_{6m}=44$ . Descriptive statistics and multiple regression models are presented in Supplement table 4.

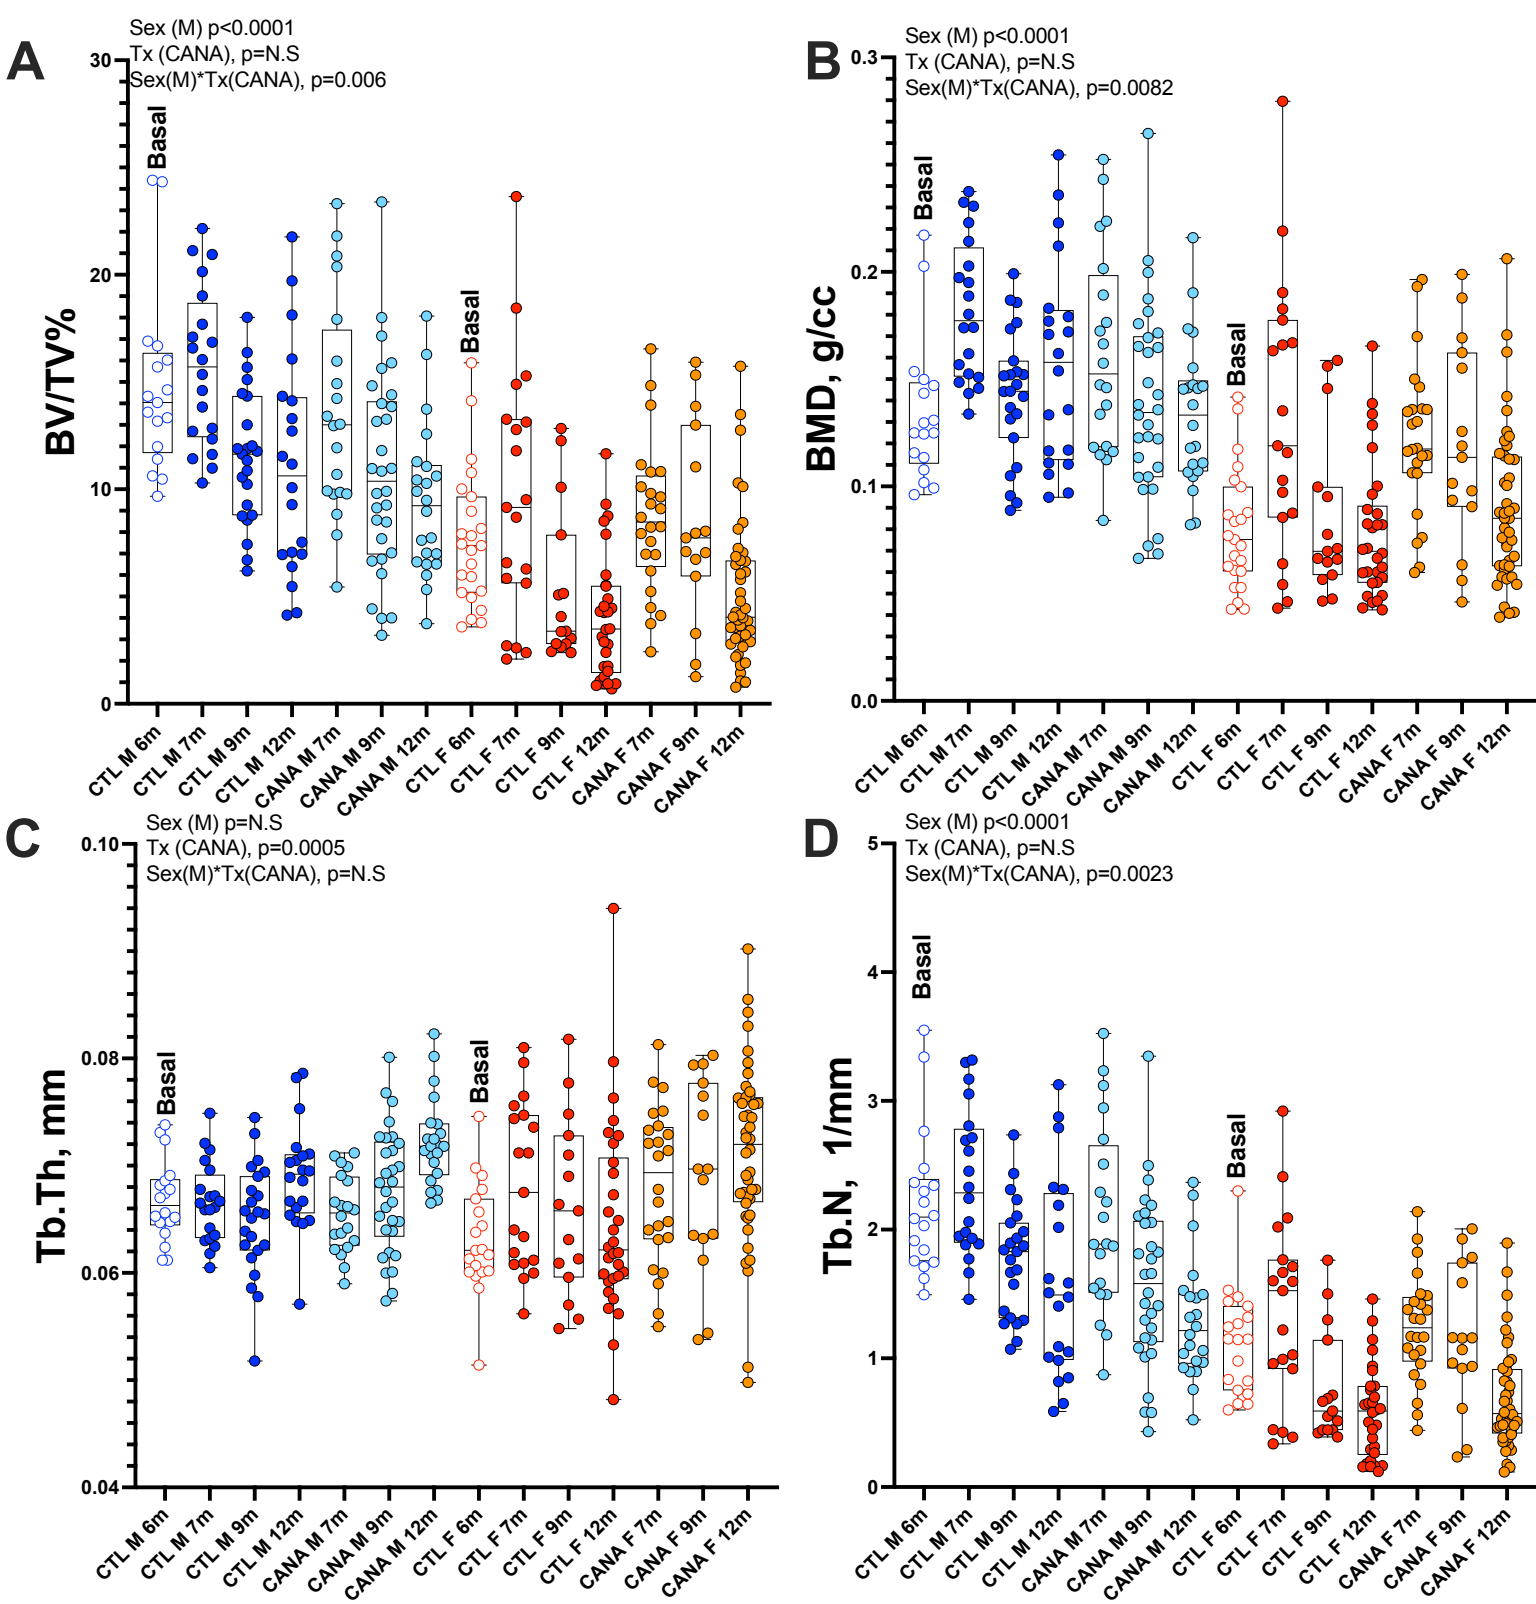

Supplement: Supplementary file 2 [file 1]
