# Supplementary material
Source: publisher figshare collection journal article supplement (https://diabetesjournals.figshare.com/articles/dataset/_/28365386)
Supplement: Supplementary file 5 [file 1]

# Supplementary RNAseq data 1

## Ten-days cultures of primary osteoblasts from CANA-treated/untreated mice

**RNAseq:** RNA was extracted from osteoblast cultures (10 days) using Qiagen RNeasy plus mini kit (Qiagen, cat# 74204). Subsequently, RNA-Seq analysis was conducted at the Wayne State University Genome Sciences Core. RNA quality was assessed using RNA ScreenTape on a 4200 TapeStation, and RNA libraries were prepared according to the QIAseq Stranded RNA Library Kits protocol. Following sequencing (NovaSeq 6000, 2 x 50 bp), the sequence reads were assembled and mapped to the mouse reference genome (Ensembl Mus\_musculus GRCm38.90) using HISAT2 v.2.1.0.13, with prior adapter trimming and quality checking. Counts quantification was determined using HTSeq-counts v0.6.0. Finally, Pairwise differential expression analysis was performed by the DESeq2 R/Bioconductor package (v. 1.34.0) (PMID: 25516281). Genes exhibiting expression changes greater than  $\pm 1.0$  log<sub>2</sub> fold change after treatments were further imputed in DAVID Bioinformatics Database NIAID/NIH for Gene Ontology (GO) analysis (PMID:19131956).

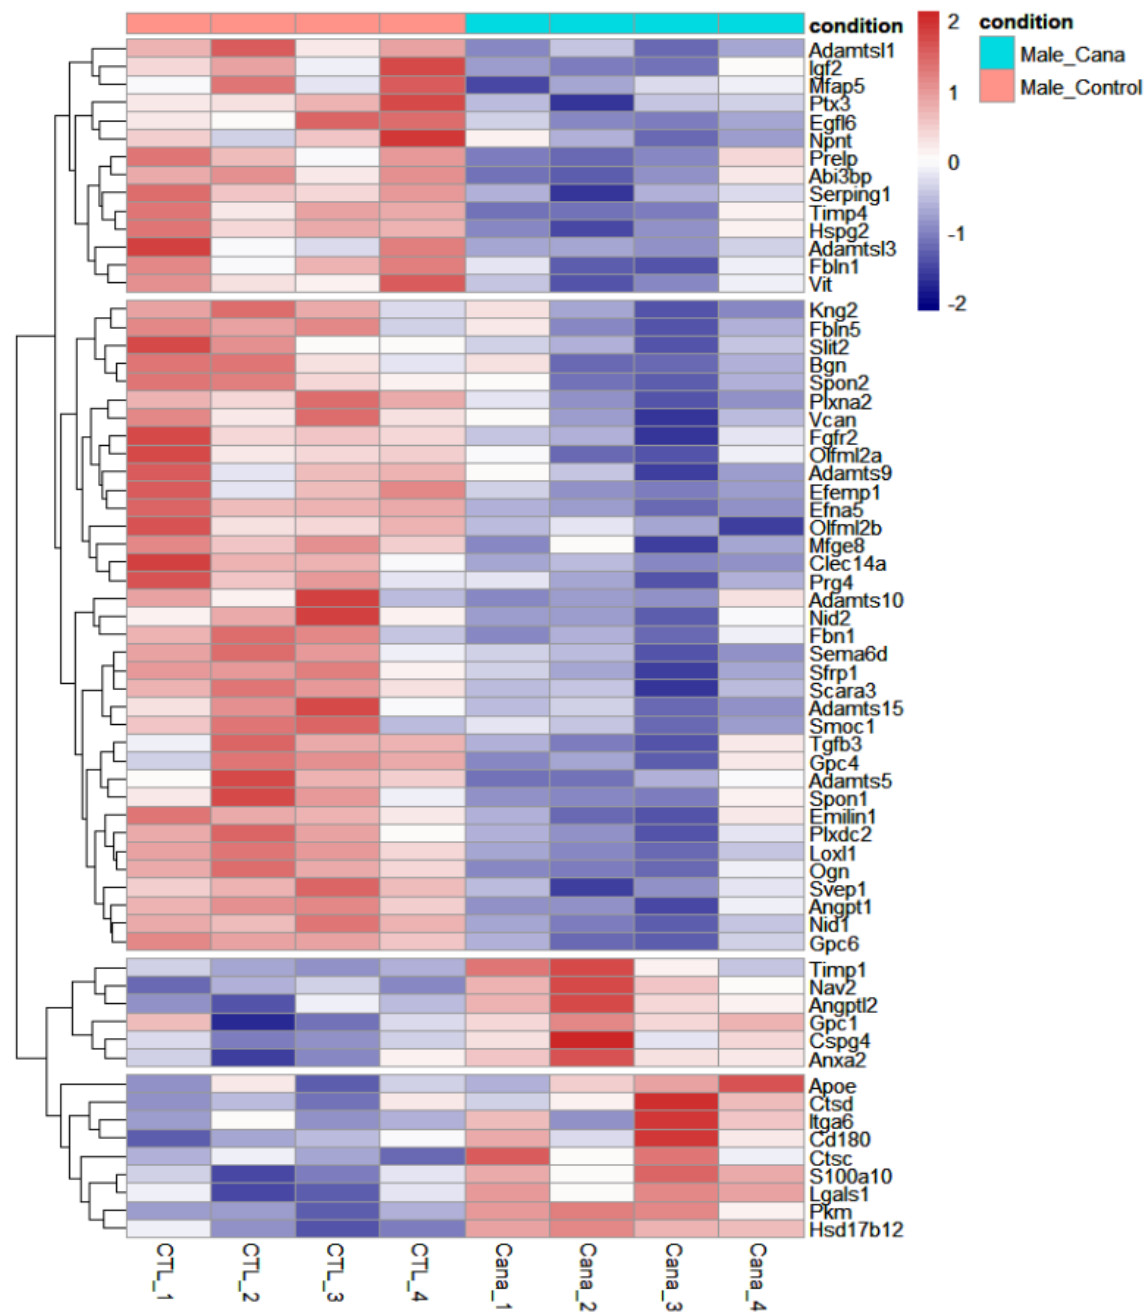

# **Males: Bone Marrow Culture Extracellular Matrix** **DEG: 50 downregulated, 15 upregulated**

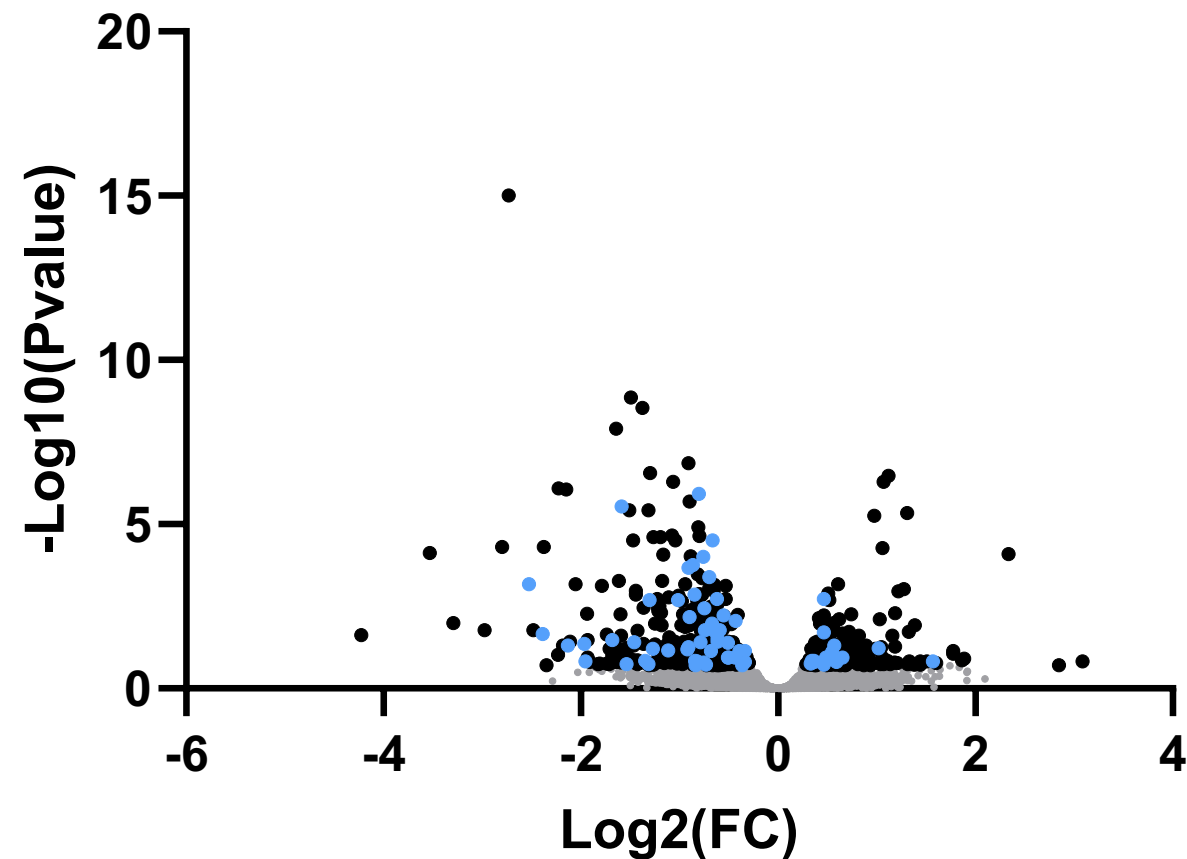



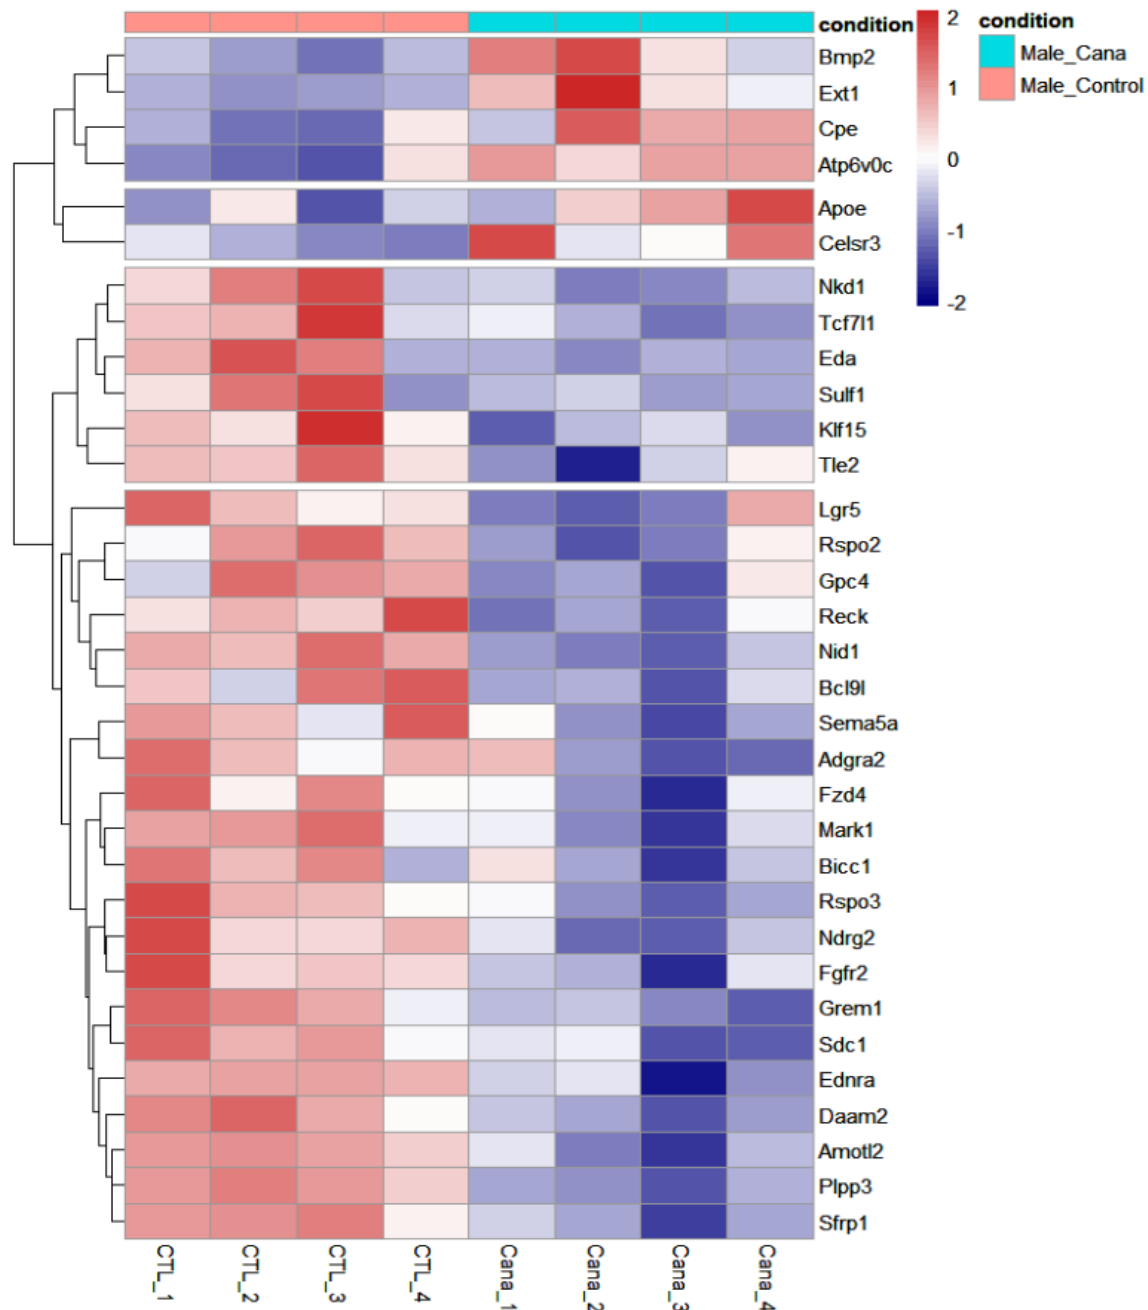

**Males: Bone Marrow Culture**  
**Wnt**  
**DEG: 27 downregulated, 6 upregulated**

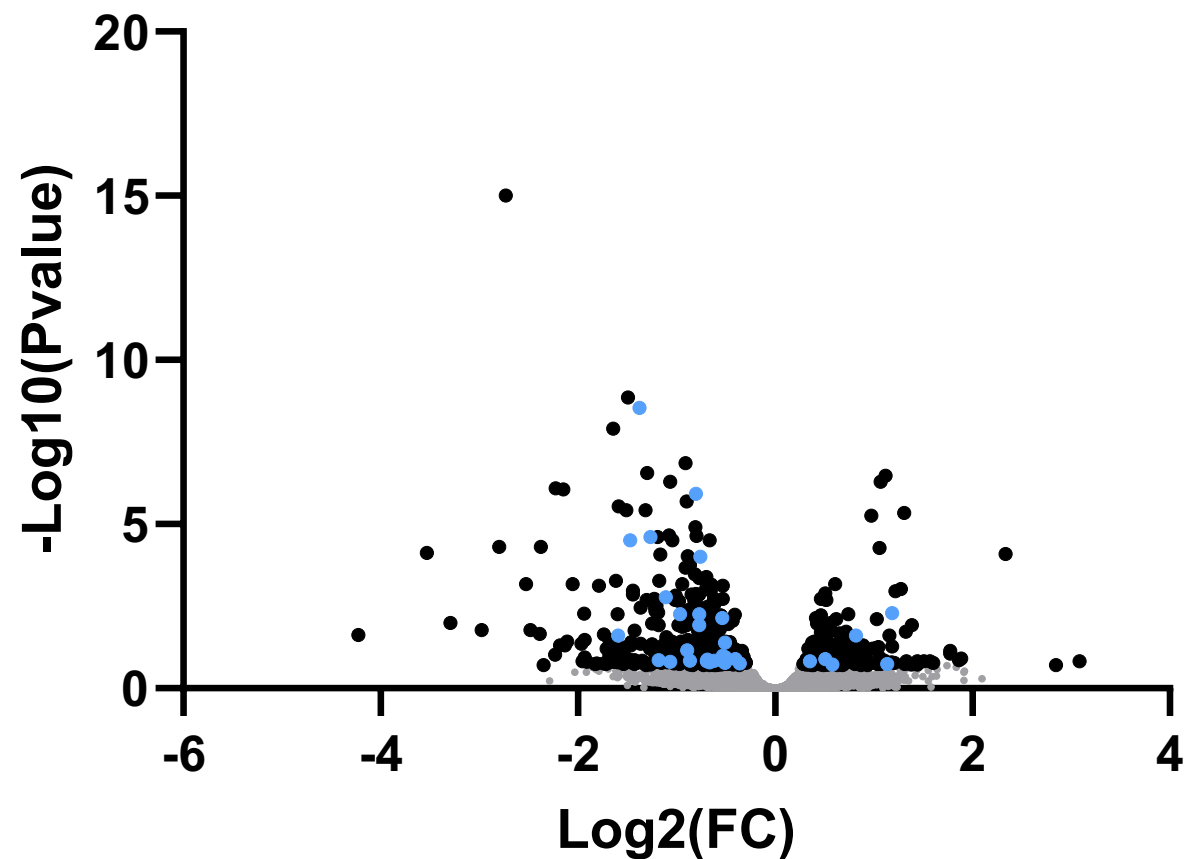

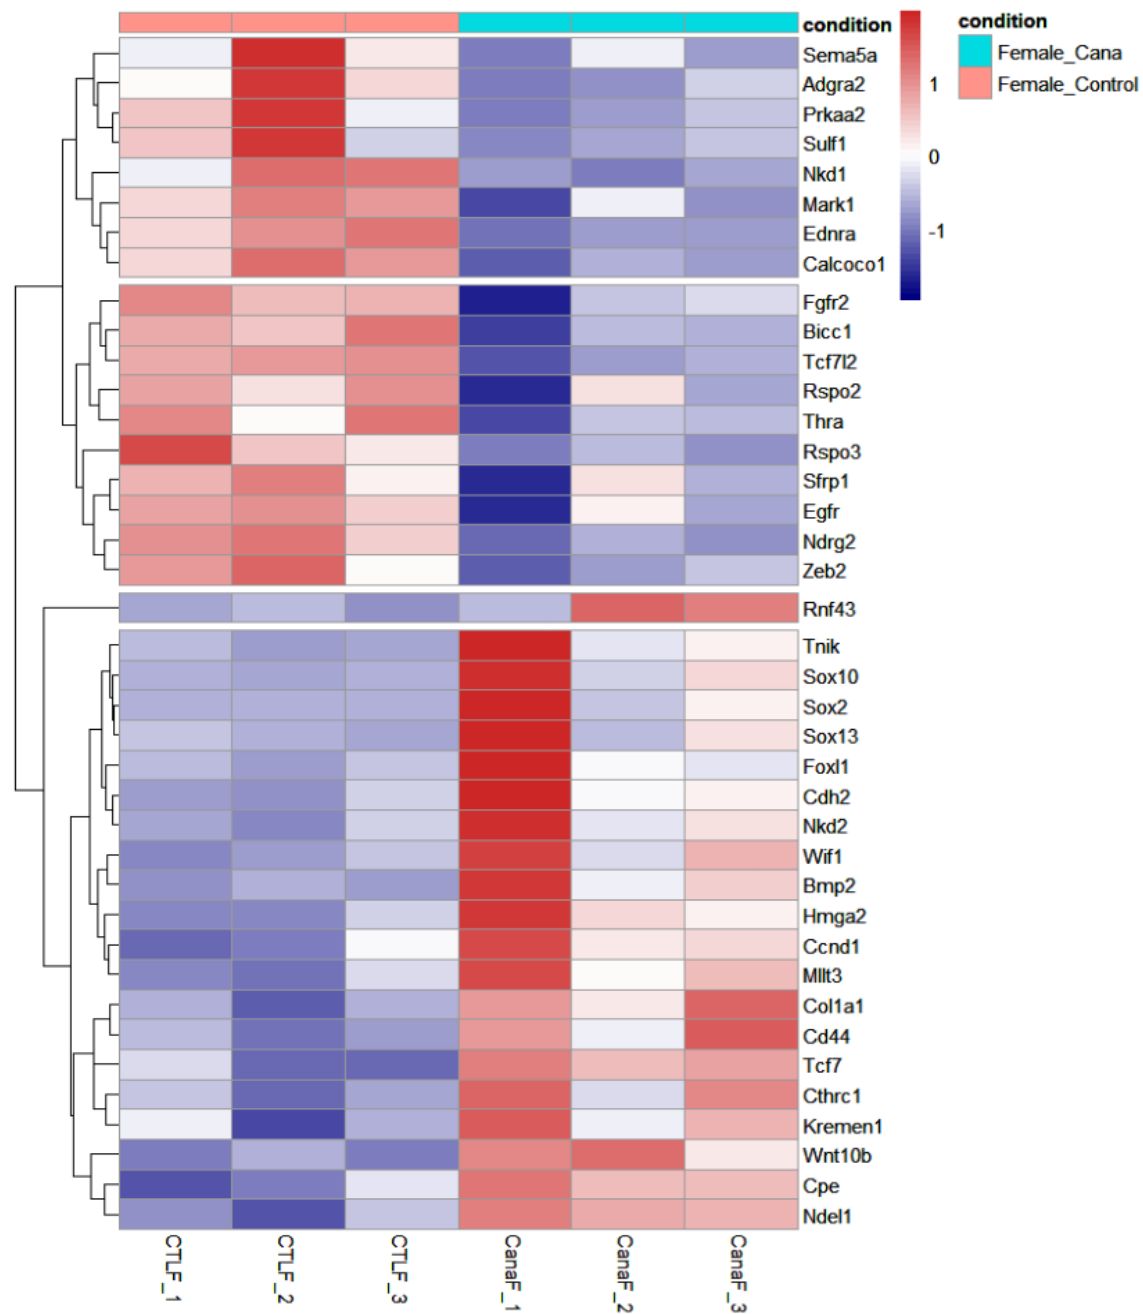

## Females: Bone Marrow Culture Wnt

DEG: 18 downregulated, 21 upregulated

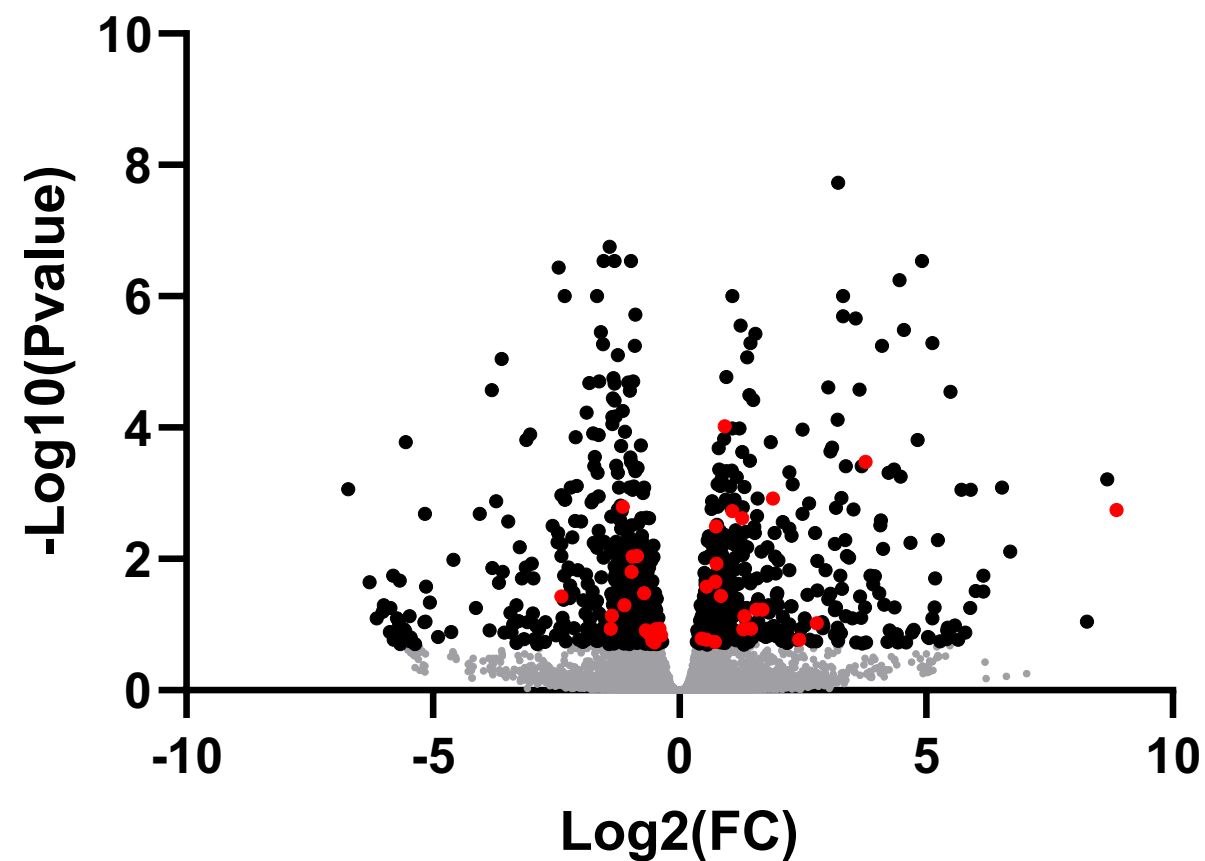

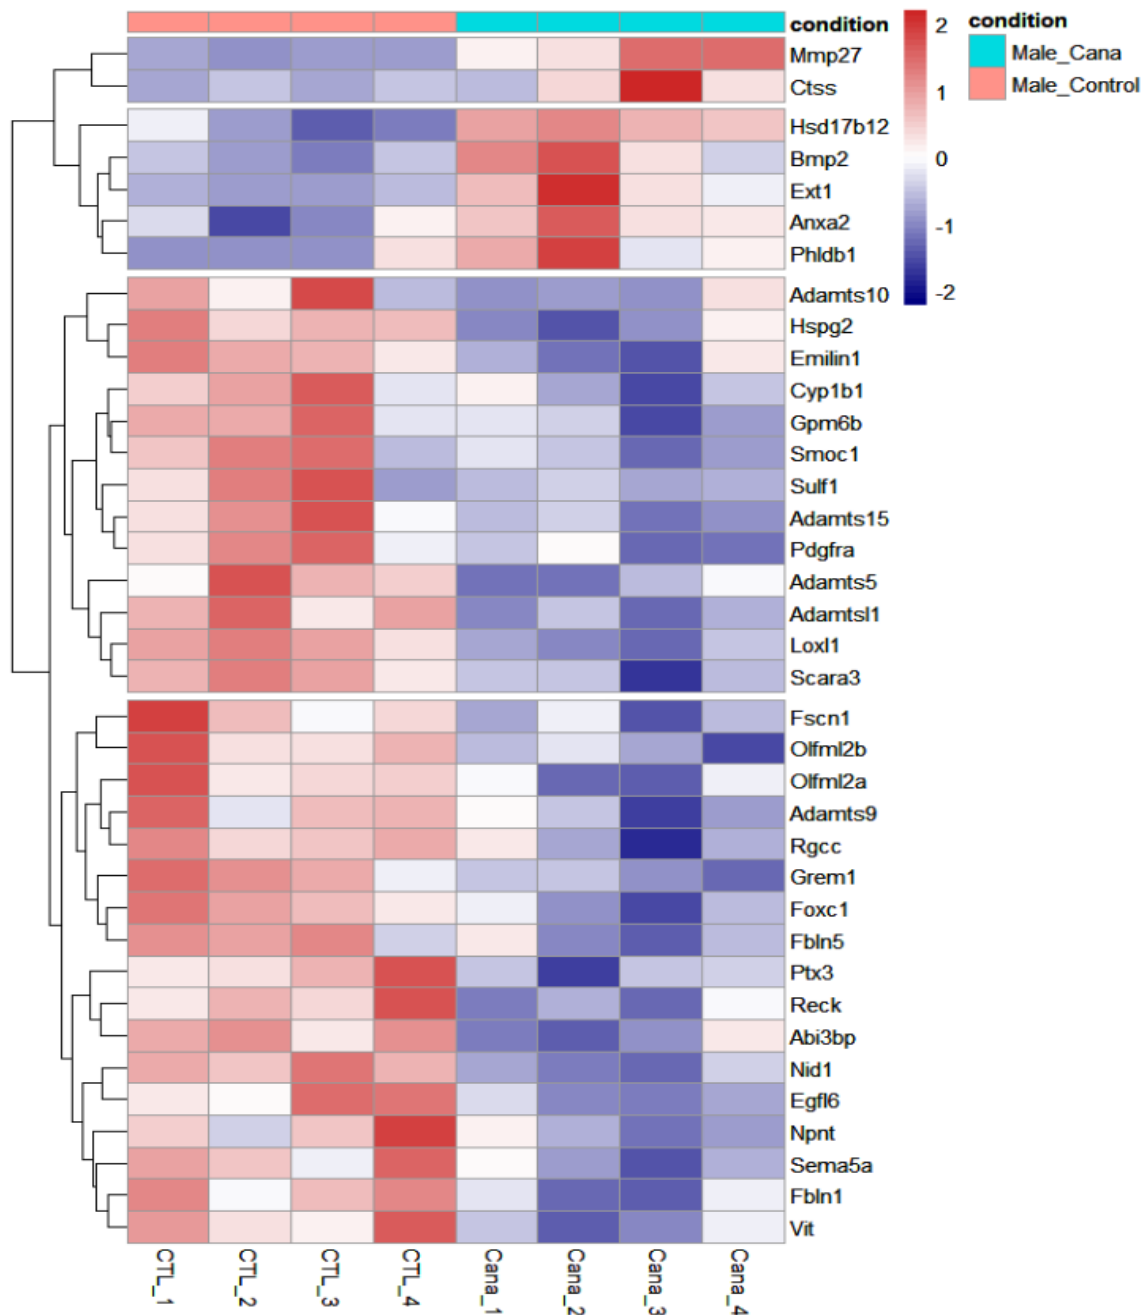

**Males: Bone Marrow Culture**  
**Extracellular Organization**  
 DEG: 30 downregulated, 7 upregulated

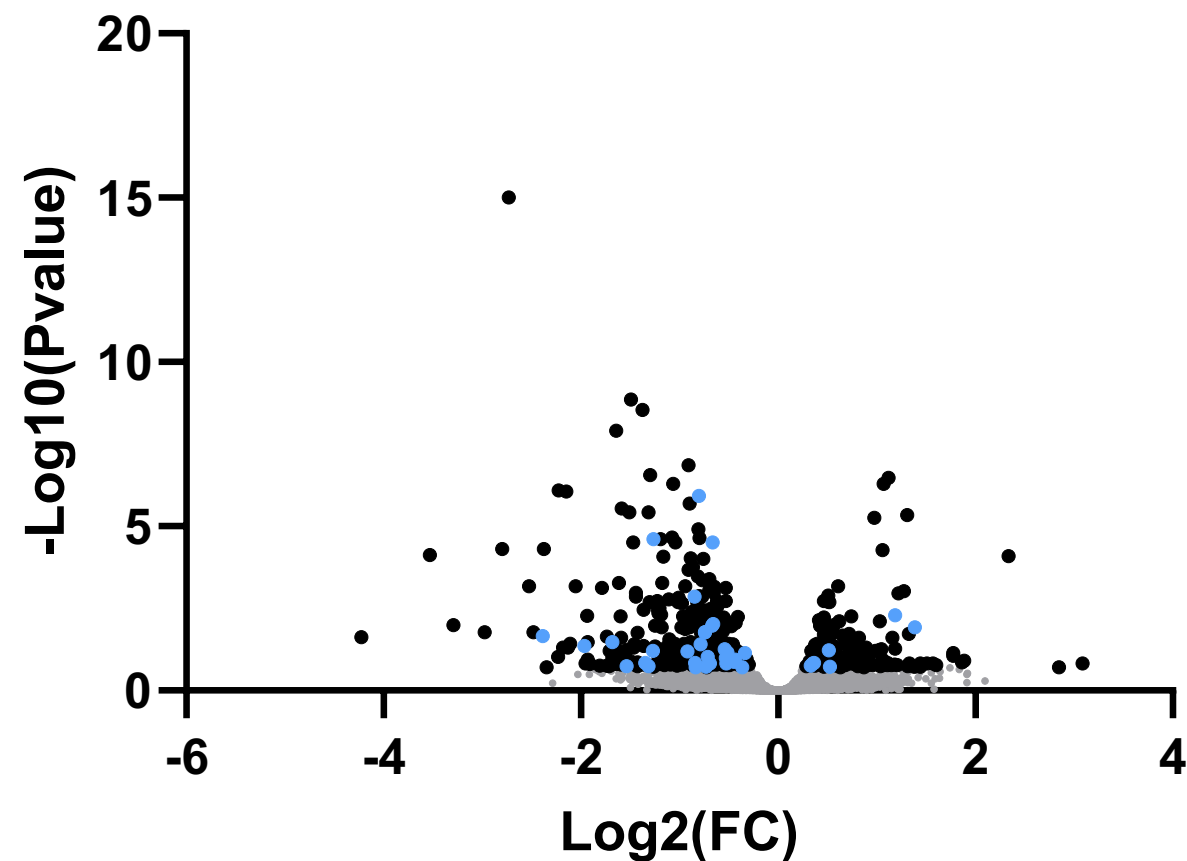

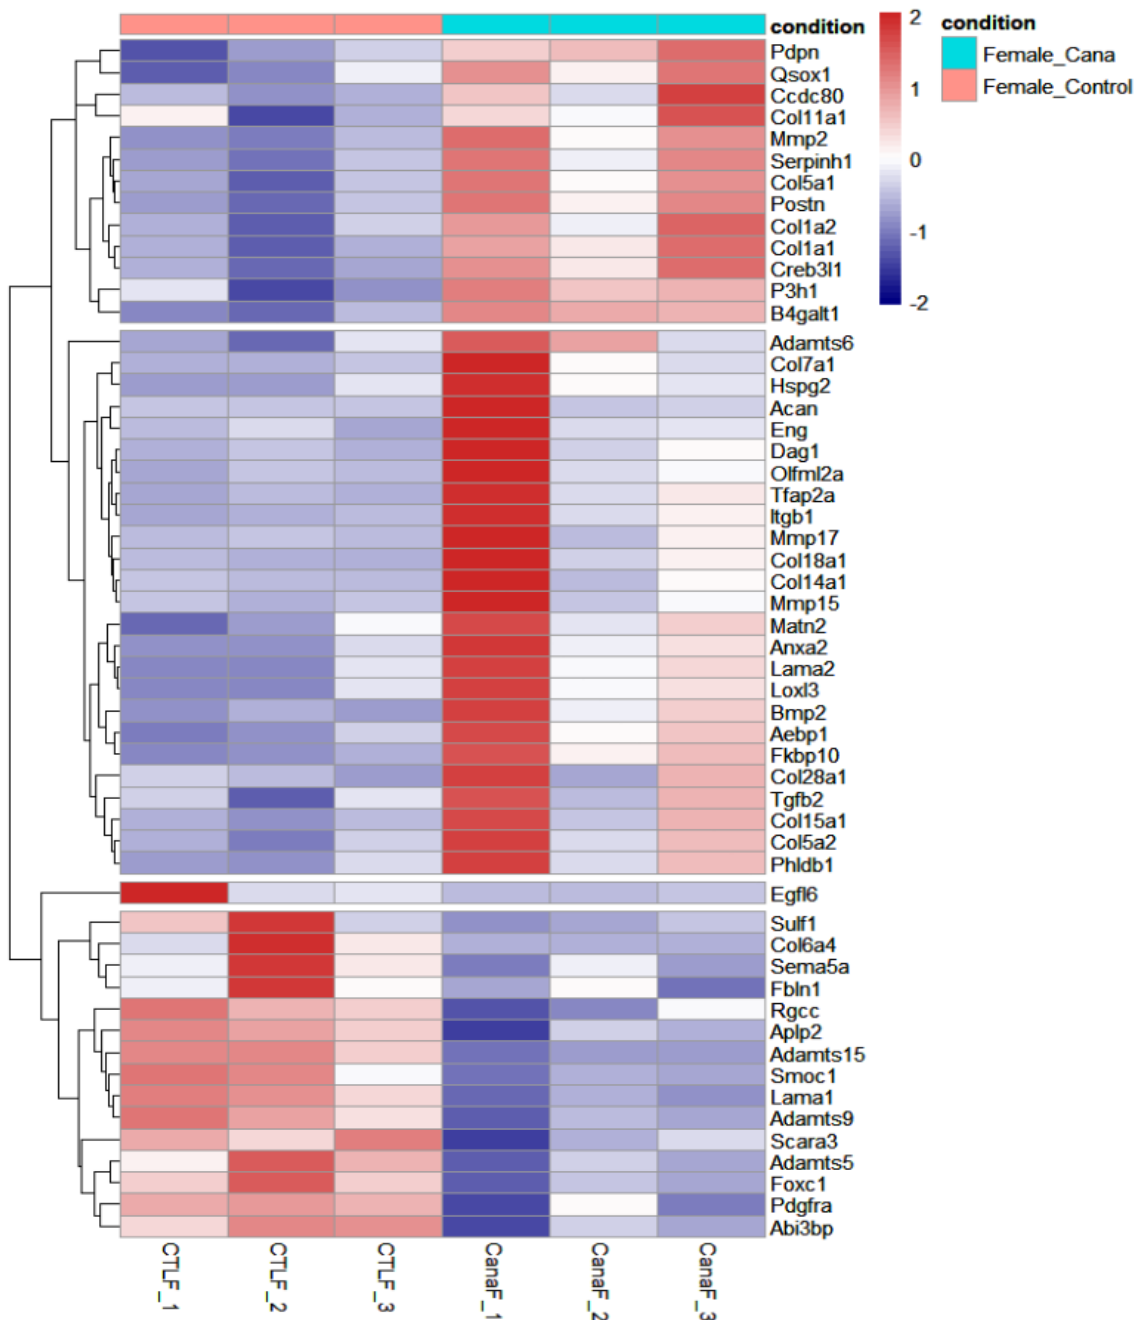

**Females: Bone Marrow Culture  
Extracellular Organization**  
DEG: 16 downregulated, 38 upregulated

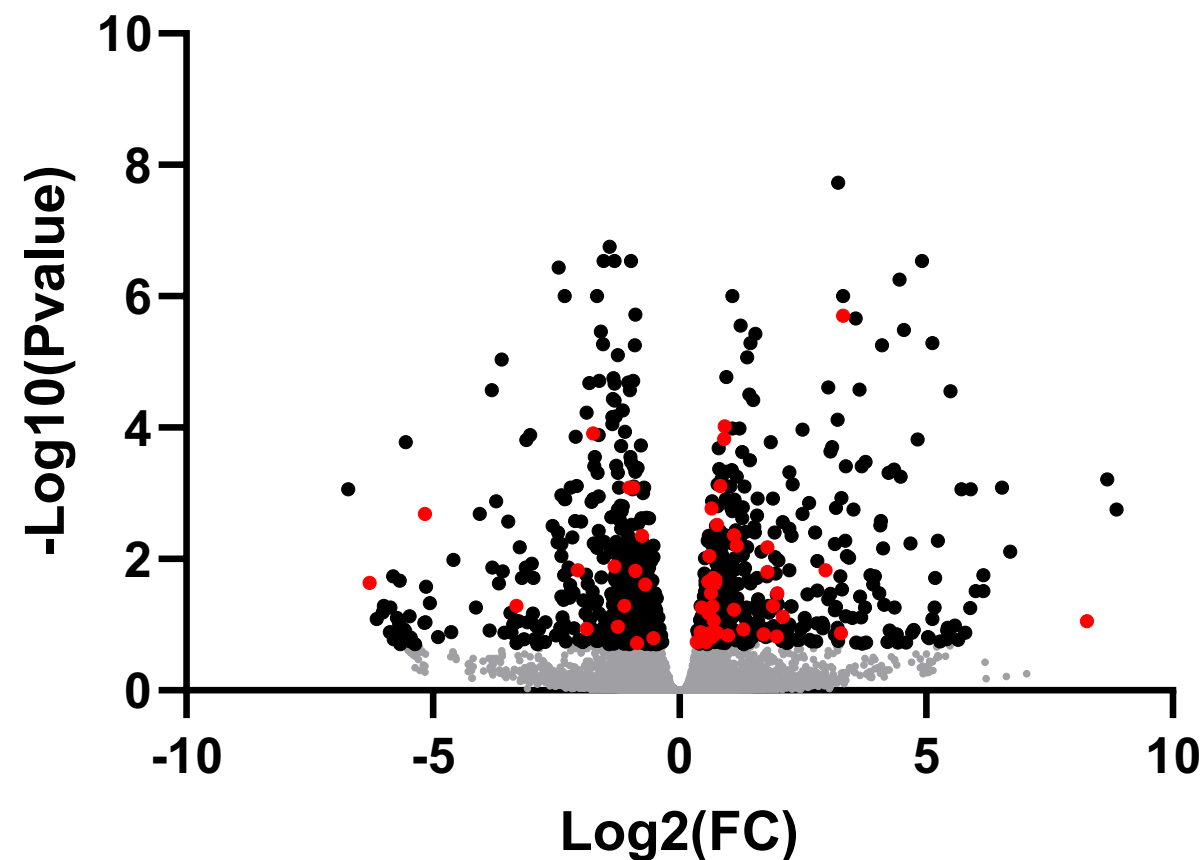

Bar chart of Biological Process categories

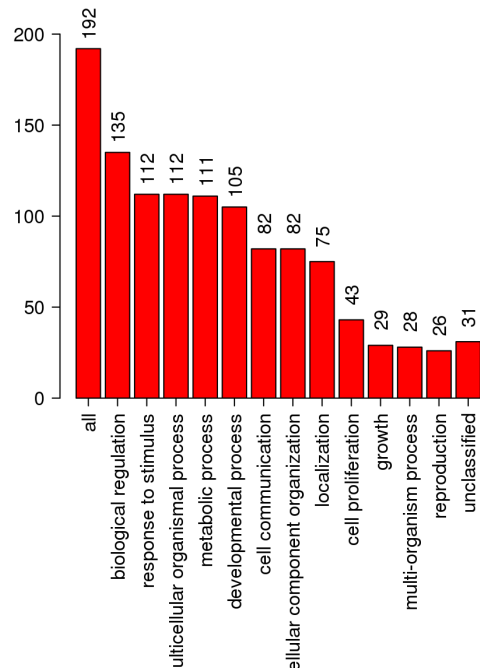

Bar chart of Cellular Component categories

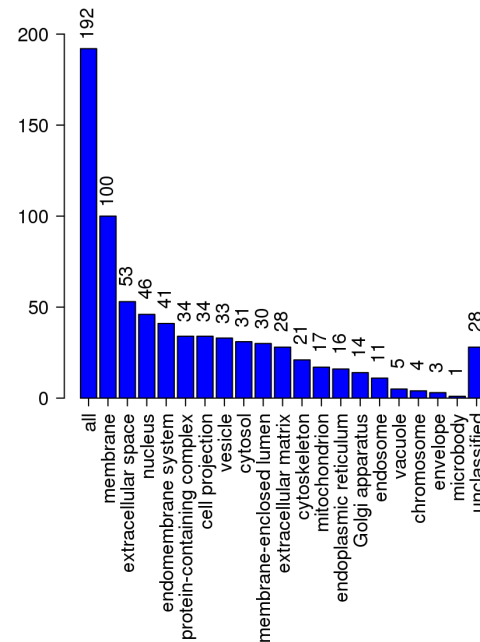

Bar chart of Molecular Function categories

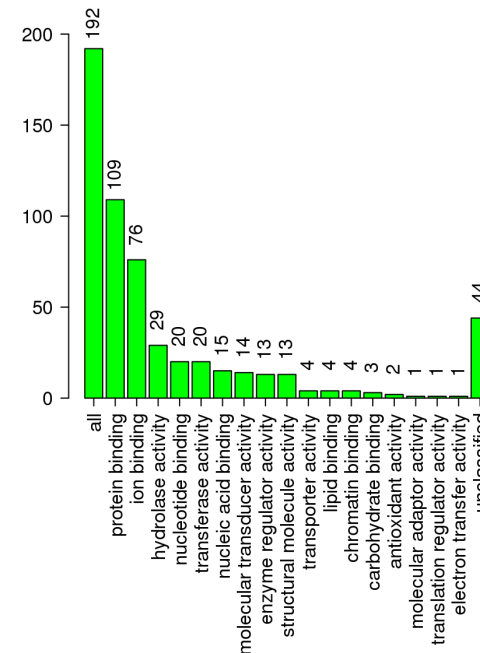

Male

Bar chart of Biological Process categories

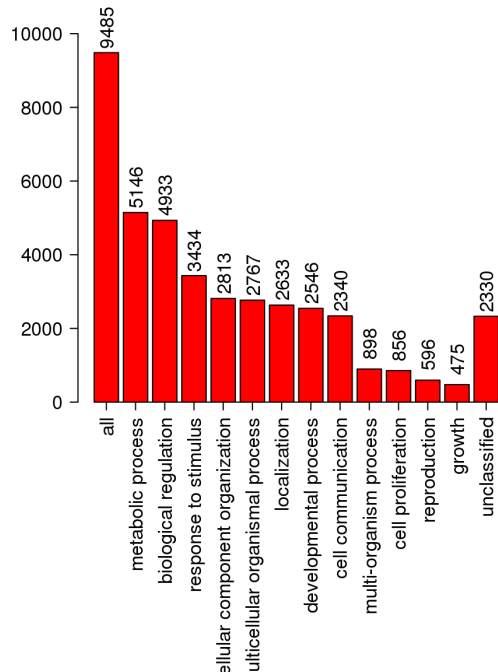

Bar chart of Cellular Component categories

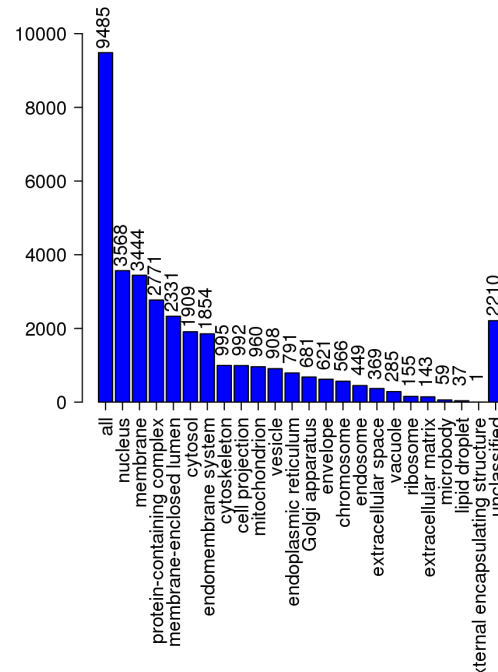

Bar chart of Molecular Function categories

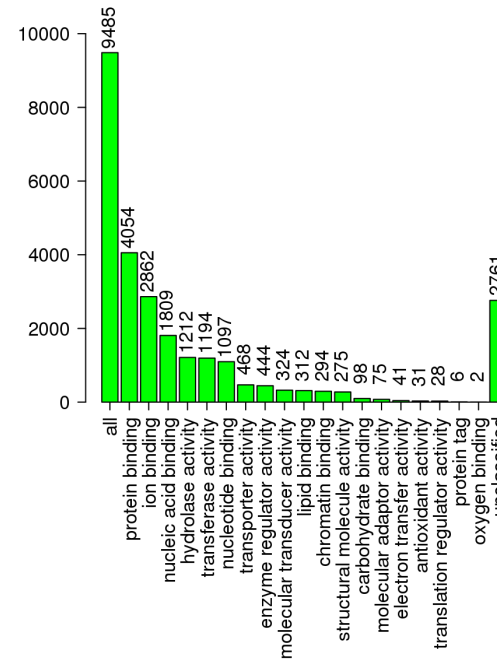

Female

| GO BP OB cultures from Females CANA vs CTL |          |      |                                                |
|--------------------------------------------|----------|------|------------------------------------------------|
| Direction                                  | Adj.Pval | Fold | Pathway                                        |
| Up                                         | 1.86E-28 | 2.4  | Anatomical structure morphogenesis             |
|                                            | 1.41E-22 | 1.9  | System development                             |
|                                            | 7.63E-21 | 1.8  | Multicellular organism development             |
|                                            | 8.34E-20 | 2.8  | Cell adhesion                                  |
|                                            | 8.34E-20 | 2.3  | Cell development                               |
|                                            | 6.23E-18 | 2.4  | Neurogenesis                                   |
|                                            | 8.41E-18 | 1.8  | Cellular developmental process                 |
|                                            | 1.51E-17 | 2.4  | Tissue development                             |
|                                            | 5.62E-17 | 1.8  | Cell differentiation                           |
|                                            | 6.43E-17 | 3.3  | Cellular component morphogenesis               |
| Down                                       | 1.44E-16 | 2.9  | Lipid metabolic process                        |
|                                            | 7.81E-14 | 2.4  | Small molecule metabolic process               |
|                                            | 6.89E-11 | 4.5  | Regulation of lipid metabolic process          |
|                                            | 9.86E-10 | 2.8  | Organic acid metabolic process                 |
|                                            | 9.86E-10 | 4    | Fatty acid metabolic process                   |
|                                            | 9.86E-10 | 2.8  | Carboxylic acid metabolic process              |
|                                            | 1.03E-09 | 3.4  | Monocarboxylic acid metabolic process          |
|                                            | 1.03E-09 | 2.8  | Oxoacid metabolic process                      |
|                                            | 2.88E-09 | 2.7  | Cellular lipid metabolic process               |
|                                            | 9.90E-09 | 1.8  | Regulation of multicellular organismal process |

| GO BP OB cultures from Males CANA vs CTL |          |      |                                           |
|------------------------------------------|----------|------|-------------------------------------------|
| Direction                                | Adj.Pval | Fold | Pathway                                   |
| Up                                       | 6.50E-06 | 2.1  | Immune system process                     |
|                                          | 6.50E-06 | 3.4  | Inflammatory response                     |
|                                          | 2.27E-05 | 2.4  | Cell migration                            |
|                                          | 2.85E-05 | 2.5  | Immune response                           |
|                                          | 3.21E-05 | 2.4  | Defense response                          |
|                                          | 8.58E-05 | 2.6  | Regulation of cellular component movement |
|                                          | 1.19E-04 | 4.1  | Adaptive immune response                  |
|                                          | 1.19E-04 | 2.2  | Cell motility                             |
|                                          | 1.19E-04 | 2.2  | Localization of cell                      |
|                                          | 1.28E-04 | 2.7  | Regulation of cell migration              |
| Down                                     | 4.19E-11 | 2.6  | Cell adhesion                             |
|                                          | 4.35E-11 | 1.7  | System development                        |
|                                          | 5.12E-11 | 2    | Anatomical structure morphogenesis        |
|                                          | 4.34E-09 | 1.6  | Multicellular organism development        |
|                                          | 4.34E-09 | 2.3  | Cell migration                            |
|                                          | 6.47E-09 | 1.9  | Cell surface receptor signaling pathway   |
|                                          | 1.31E-08 | 1.7  | Animal organ development                  |
|                                          | 2.39E-08 | 2.4  | Circulatory system development            |
|                                          | 2.81E-08 | 2.6  | Regulation of cell migration              |
|                                          | 2.81E-08 | 2.5  | Tube development                          |

**SGLT2 expression in primary osteoblasts:** We did not detect SLC5A2 gene expression in the RNAseq data of MSC cultures stimulated for ten days in osteogenic media.

| Female (counts ) | Slc5a2 | Housekeeping gene (Rpl13a) | Male (counts ) | Slc5a2 | Housekeeping gene (Rpl13a) |
|------------------|--------|----------------------------|----------------|--------|----------------------------|
| CTLF1            | 0      | 719                        | CTTLM1         | 0      | 842                        |
| CTLF2            | 0      | 655                        | CTTLM2         | 2      | 596                        |
| CTLF3            | 8      | 1104                       | CTTLM3         | 0      | 491                        |
| CanaF1           | 1      | 1003                       | CTTLM4         | 2      | 557                        |
| CanaF2           | 0      | 734                        | CANAM1         | 1      | 923                        |
| CanaF3           | 6      | 1496                       | CANAM2         | 0      | 810                        |
|                  |        |                            | CANAM3         | 8      | 586                        |
|                  |        |                            | CANAM4         | 3      | 521                        |
| log2FC           | -0.79  | 0.02                       | log2FC         | 1.66   | 0.00                       |
| padj             | 1.000  | 1.000                      | padj           | 1.000  | 1.000                      |

A summary of available databases reporting SLC5A2 gene expression in BMSCs, osteoblasts, and osteoclasts.

| Database (link)                                                                                                                                             | Search by    |                                                   |        | Result                                                                             |
|-------------------------------------------------------------------------------------------------------------------------------------------------------------|--------------|---------------------------------------------------|--------|------------------------------------------------------------------------------------|
|                                                                                                                                                             | Species      | Cell type                                         | Gene   |                                                                                    |
| Single Cell Portal<br><a href="https://singlecell.broadinstitute.org/single_cell">https://singlecell.broadinstitute.org/single_cell</a>                     | Homo sapiens | mesenchymal stem cell OR osteoblast OR osteoclast | SLC5A2 | No results found                                                                   |
| Single Cell Portal<br><a href="https://singlecell.broadinstitute.org/single_cell">https://singlecell.broadinstitute.org/single_cell</a>                     | Mus musculus | mesenchymal stem cell OR osteoblast OR osteoclast | SLC5A2 | No results found                                                                   |
| Expression Atlas <a href="https://www.ebi.ac.uk/gxa/home">https://www.ebi.ac.uk/gxa/home</a>                                                                | Homo sapiens | mesenchymal stem cell                             | SLC5A2 | hMSC-AT cell line: Expression level 0.6 TPM (very low)                             |
|                                                                                                                                                             |              | osteoblast OR osteoclast                          |        | No results found                                                                   |
| Expression Atlas <a href="https://www.ebi.ac.uk/gxa/home">https://www.ebi.ac.uk/gxa/home</a>                                                                | Mus musculus | mesenchymal stem cell OR osteoblast OR osteoclast | SLC5A2 | No results found                                                                   |
| NCBI GEO Dataset<br><a href="https://www.ncbi.nlm.nih.gov/gds/advanced">https://www.ncbi.nlm.nih.gov/gds/advanced</a>                                       | Homo sapiens | mesenchymal stem cell OR osteoblast OR osteoclast | SLC5A2 | No items found                                                                     |
| NCBI GEO Dataset<br><a href="https://www.ncbi.nlm.nih.gov/gds/advanced">https://www.ncbi.nlm.nih.gov/gds/advanced</a>                                       | Mus musculus | mesenchymal stem cell OR osteoblast OR osteoclast | SLC5A2 | No items found                                                                     |
| MGI Gene eXpression Database --(RNA-Seq)<br><a href="https://www.informatics.jax.org/expression.shtml">https://www.informatics.jax.org/expression.shtml</a> | Mus musculus | bone marrow; Wild type only                       | SLC5A2 | No results with expression data found                                              |
| NCBI GEO Dataset<br><a href="https://www.ncbi.nlm.nih.gov/gds/advanced">https://www.ncbi.nlm.nih.gov/gds/advanced</a>                                       | Mus musculus | all                                               | SLC5A2 | A comparative kidney transcriptome analysis of bicarbonate-loaded in srr-null mice |

## RNAseq of **Bone marrow** from CANA-treated/untreated mice

**RNAseq:** RNA was extracted using Qiagen RNeasy plus mini kit (Qiagen, cat# 74204) from the bone marrow (BM) of the same samples that were used for the metabolome analysis. Subsequently, RNA-Seq analysis was conducted at the Wayne State University Genome Sciences Core. RNA quality was assessed using RNA ScreenTape on a 4200 TapeStation, and RNA libraries were prepared according to the QIAseq Stranded RNA Library Kits protocol. Following sequencing (NovaSeq 6000, 2 x 50 bp), the quality of raw data was checked by FastQC (v. 0.11.9), and the read counts were quantified using Salmon (v. 1.4.0) against the GRCm38.p6 mouse transcriptome reference (NCBI) database. Pairwise differential expression analysis was performed by the DESeq2 R/Bioconductor package (v. 1.34.0) (PMID: 25516281). Genes exhibiting expression changes greater than  $\pm 1.0$  log<sub>2</sub> fold change after treatments were further imputed in DAVID Bioinformatics Database NIAID/NIH for Gene Ontology (GO) analysis (PMID:19131956).



**SGLT2 expression in bone marrow:** We did not detect SLC5A2 gene expression in the RNAseq data of bone marrow extracted from mice treated with CANA for 1.5 months.

| Male (counts ) | Slc5a2 | Housekeeping gene (Rpl13a) |
|----------------|--------|----------------------------|
| MCTL_1         | 0      | 1973                       |
| MCTL_2         | 2      | 1660                       |
| MCTL_3         | 12     | 927                        |
| MCTL_4         | 0      | 1705                       |
| MCTL_5         | 0      | 1820                       |
| MCana_1        | 0      | 1334                       |
| MCana_2        | 0      | 2178                       |
| MCana_3        | 0      | 3033                       |
| log2FC         | 0.008  | 0.001                      |
| padj           | 1.000  | 1.000                      |

# **IntegrOmics:**

## **Cortical bone tissue metabolome and bone marrow RNAseq**

Partial least squares (PLS) regression analysis was done using the IntegrOmics R package v6.22.0 to investigate the correlations between the transcriptomics and metabolomics profiles (PMID:19706745).

STITCH ([www.stitch.embl.de](http://www.stitch.embl.de)) was used to further explore the biological relationships between metabolites-genes, metabolites-metabolites and genes-genes.

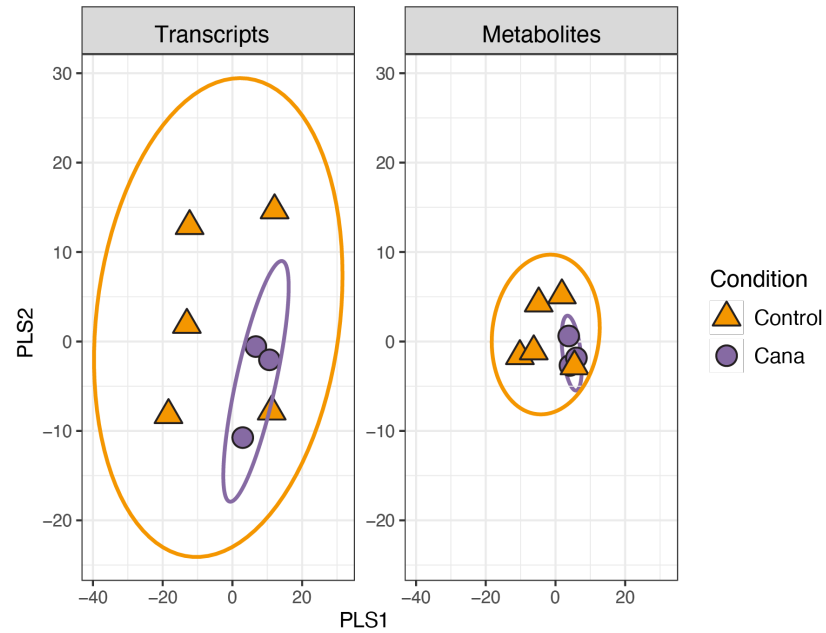

Sample plot from the PLS model performed on the cana data with two dimensions. Variates/Components associated to each data set (or block) are shown. Focusing only on the projection of the sample on the first component shows that the predictors in X (transcripts) tend to explain the group differences between control and cana. This agrees with the levels of the Y variable (metabolites).

The plot shows a clear separation between the Cana and Control groups along the first variate (Variate 1) - the ellipses do not overlap much (95% CI). This indicates that the first variate captures significant variation between these two groups due to the DEGs and metabolites.

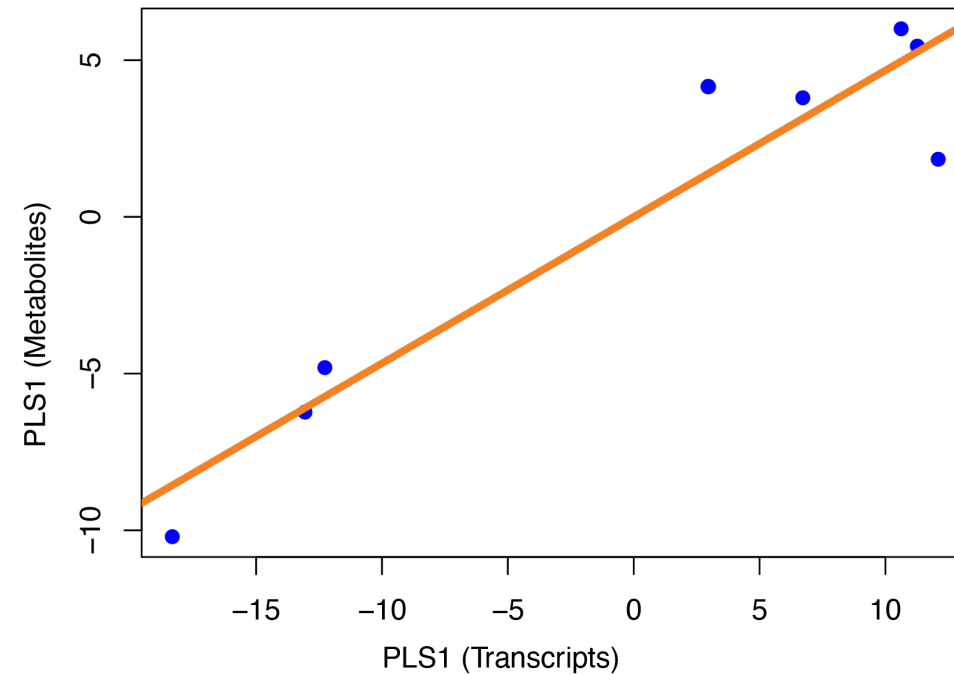

Comp1 of X with Comp1 of Y:

The  $r$  value is 0.95, indicating a very strong positive correlation between the first component of X (DEG) and the first component of Y (significant metabolites). This suggests that these components are capturing similar or related underlying structures or patterns in the data from both blocks. This is confirmed by fitting a regression line using PLS scores.

# STITCH interactions

| #node1     | node2           | Node1 string internal id | Node2 string internal id | Node1 external id        | Node2 external id        | Neighborhood on chromosome | Gene fusion | Phylogenetic cooccurrence | homology | coexpression | Experimentally determined interaction | Database annotated | Automated text mining | prediction | Combined score |
|------------|-----------------|--------------------------|--------------------------|--------------------------|--------------------------|----------------------------|-------------|---------------------------|----------|--------------|---------------------------------------|--------------------|-----------------------|------------|----------------|
| Creb1      | Rps6ka2         | 2103842                  | 2096039                  | 10090.ENSMUSP00000059973 | 10090.ENSMUSP00000024575 | 0                          | 0           | 0                         | 0        | 0            | 0.214                                 | 0.946              | 0.973                 | 0          | 0.998          |
| Creb1      | Mapk3           | 2103842                  | 2102406                  | 10090.ENSMUSP00000059973 | 10090.ENSMUSP00000051619 | 0                          | 0           | 0                         | 0        | 0            | 0.152                                 | 0.954              | 0.956                 | 0          | 0.998          |
| Creb1      | Mapk1           | 2103842                  | 2095837                  | 10090.ENSMUSP00000059973 | 10090.ENSMUSP00000023462 | 0                          | 0           | 0                         | 0        | 0            | 0.152                                 | 0.961              | 0.927                 | 0          | 0.997          |
| isoleucine | methionine      | -100000791               | -100000876               | -1.CID100000791          | -1.CID100000876          | 0                          | 0           | 0                         | 0.513    | 0            | 0                                     | 0.9                | 0.966                 | 0          | 0.996          |
| Mapk3      | Rps6ka2         | 2102406                  | 2096039                  | 10090.ENSMUSP00000051619 | 10090.ENSMUSP00000024575 | 0                          | 0           | 0                         | 0.681    | 0            | 0.878                                 | 0.946              | 0.796                 | 0          | 0.994          |
| Mapk3      | Mapk1           | 2102406                  | 2095837                  | 10090.ENSMUSP00000051619 | 10090.ENSMUSP00000023462 | 0                          | 0           | 0.527                     | 0.987    | 0            | 0.832                                 | 0.954              | 0.946                 | 0          | 0.992          |
| Abat       | succinic semia. | 2104402                  | -100001112               | 10090.ENSMUSP00000063548 | -1.CID100001112          | 0                          | 0           | 0                         | 0        | 0            | 0.561                                 | 0.9                | 0.795                 | 0          | 0.99           |
| Rps6ka2    | Mapk1           | 2096039                  | 2095837                  | 10090.ENSMUSP00000024575 | 10090.ENSMUSP00000023462 | 0                          | 0           | 0                         | 0.692    | 0            | 0.747                                 | 0.946              | 0.639                 | 0          | 0.988          |
| Rps6ka2    | sunitinib       | 2096039                  | -103086686               | 10090.ENSMUSP00000024575 | -1.CID103086686          | 0                          | 0           | 0                         | 0        | 0            | 0.866                                 | 0.795              | 0.534                 | 0          | 0.986          |
| Mat1a      | methionine      | 2101069                  | -100000876               | 10090.ENSMUSP00000044288 | -1.CID100000876          | 0                          | 0           | 0                         | 0        | 0            | 0.654                                 | 0.9                | 0.58                  | 0          | 0.984          |
| Tsc2       | Rps6ka2         | 2109084                  | 2096039                  | 10090.ENSMUSP00000094986 | 10090.ENSMUSP00000024575 | 0                          | 0           | 0                         | 0        | 0            | 0.412                                 | 0.885              | 0.789                 | 0          | 0.984          |
| Lars       | Lars2           | 2109130                  | 2099660                  | 10090.ENSMUSP00000095197 | 10090.ENSMUSP00000036710 | 0                          | 0           | 0                         | 0        | 0            | 0                                     | 0.8                | 0.906                 | 0          | 0.98           |
| Pdpk1      | Rps6ka2         | 2110454                  | 2096039                  | 10090.ENSMUSP00000099991 | 10090.ENSMUSP00000024575 | 0                          | 0           | 0                         | 0.74     | 0            | 0.527                                 | 0.946              | 0.766                 | 0          | 0.978          |
| Adhfe1     | succinic semia. | 2112622                  | -100001112               | 10090.ENSMUSP00000116627 | -1.CID100001112          | 0                          | 0           | 0                         | 0        | 0            | 0                                     | 0.9                | 0.776                 | 0          | 0.976          |
| Tsc2       | Mapk3           | 2109084                  | 2102406                  | 10090.ENSMUSP00000094986 | 10090.ENSMUSP00000051619 | 0                          | 0           | 0                         | 0        | 0            | 0.27                                  | 0.908              | 0.667                 | 0          | 0.975          |
| Tsc2       | Mapk1           | 2109084                  | 2095837                  | 10090.ENSMUSP00000094986 | 10090.ENSMUSP00000023462 | 0                          | 0           | 0                         | 0        | 0            | 0.374                                 | 0.908              | 0.586                 | 0          | 0.974          |
| Lars       | methionine      | 2109130                  | -100000876               | 10090.ENSMUSP00000095197 | -1.CID100000876          | 0                          | 0           | 0                         | 0        | 0            | 0.644                                 | 0.9                | 0.184                 | 0          | 0.969          |
| Lars       | isoleucine      | 2109130                  | -100000791               | 10090.ENSMUSP00000095197 | -1.CID100000791          | 0                          | 0           | 0                         | 0        | 0            | 0.644                                 | 0.9                | 0.17                  | 0          | 0.968          |
| Pdpk1      | Tsc2            | 2110454                  | 2109084                  | 10090.ENSMUSP00000099991 | 10090.ENSMUSP00000094986 | 0                          | 0           | 0                         | 0        | 0            | 0                                     | 0.9                | 0.446                 | 0          | 0.942          |
| Pdpk1      | Mapk1           | 2110454                  | 2095837                  | 10090.ENSMUSP00000099991 | 10090.ENSMUSP00000023462 | 0                          | 0           | 0                         | 0.671    | 0            | 0.119                                 | 0.9                | 0.28                  | 0          | 0.915          |
| Npepps     | methionine      | 2093239                  | -100000876               | 10090.ENSMUSP00000001480 | -1.CID100000876          | 0                          | 0           | 0                         | 0        | 0            | 0                                     | 0.9                | 0.143                 | 0          | 0.911          |
| Npepps     | isoleucine      | 2093239                  | -100000791               | 10090.ENSMUSP00000001480 | -1.CID100000791          | 0                          | 0           | 0                         | 0        | 0            | 0                                     | 0.9                | 0                     | 0          | 0.9            |
| Pdpk1      | sunitinib       | 2110454                  | -103086686               | 10090.ENSMUSP00000099991 | -1.CID103086686          | 0                          | 0           | 0                         | 0        | 0            | 0.14                                  | 0.795              | 0                     | 0          | 0.818          |
| Mapk3      | sunitinib       | 2102406                  | -103086686               | 10090.ENSMUSP00000051619 | -1.CID103086686          | 0                          | 0           | 0                         | 0        | 0            | 0                                     | 0.795              | 0.133                 | 0          | 0.817          |
| Mapk1      | sunitinib       | 2095837                  | -103086686               | 10090.ENSMUSP00000023462 | -1.CID103086686          | 0                          | 0           | 0                         | 0        | 0            | 0                                     | 0.795              | 0                     | 0          | 0.795          |
| Lars2      | isoleucine      | 2099660                  | -100000791               | 10090.ENSMUSP00000036710 | -1.CID100000791          | 0                          | 0           | 0                         | 0        | 0            | 0.644                                 | 0                  | 0.166                 | 0          | 0.694          |
| Lars2      | methionine      | 2099660                  | -100000876               | 10090.ENSMUSP00000036710 | -1.CID100000876          | 0                          | 0           | 0                         | 0        | 0            | 0.644                                 | 0                  | 0.142                 | 0          | 0.686          |
| Abat       | Aldh11l         | 2104402                  | 2098399                  | 10090.ENSMUSP00000063548 | 10090.ENSMUSP00000032175 | 0.224                      | 0           | 0                         | 0        | 0.107        | 0.165                                 | 0                  | 0.265                 | 0          | 0.518          |
| Aldh11l    | succinic semia. | 2098399                  | -100001112               | 10090.ENSMUSP00000032175 | -1.CID100001112          | 0                          | 0           | 0                         | 0        | 0            | 0.512                                 | 0                  | 0                     | 0          | 0.512          |
| Adhfe1     | Aldh11l         | 2112622                  | 2098399                  | 10090.ENSMUSP00000116627 | 10090.ENSMUSP00000032175 | 0.363                      | 0           | 0                         | 0        | 0            | 0                                     | 0                  | 0.245                 | 0          | 0.499          |
| Rps6ka2    | isoleucine      | 2096039                  | -100000791               | 10090.ENSMUSP00000024575 | -1.CID100000791          | 0                          | 0           | 0                         | 0        | 0            | 0                                     | 0                  | 0.496                 | 0          | 0.496          |
| Adhfe1     | isoleucine      | 2112622                  | -100000791               | 10090.ENSMUSP00000116627 | -1.CID100000791          | 0                          | 0           | 0                         | 0        | 0            | 0                                     | 0                  | 0.483                 | 0          | 0.483          |
| Hbq1a      | methionine      | 2094901                  | -100000876               | 10090.ENSMUSP00000020535 | -1.CID100000876          | 0                          | 0           | 0                         | 0        | 0            | 0.462                                 | 0                  | 0                     | 0          | 0.462          |
| Tsc2       | Creb1           | 2109084                  | 2103842                  | 10090.ENSMUSP00000094986 | 10090.ENSMUSP00000059973 | 0                          | 0           | 0                         | 0        | 0            | 0                                     | 0                  | 0.407                 | 0          | 0.407          |
