# Supplementary material
Source: publisher figshare collection journal article supplement (https://diabetesjournals.figshare.com/articles/dataset/_/28365386)
Supplement: Supplementary file 6 [file 1]

# Supplementary Tables

Descriptive statistics (means, standard deviations) were computed for each outcome, and bivariate associations were estimated using Pearson correlation coefficients. Multiple regression models included predictors for treatment, sex, and the total amount of observed treatment time. Statistical significance for main effects of treatment and sex was determined through comparisons to the Bonferroni-adjusted significance level (0.0004). Following primary models, exploratory analyses were conducted by including additional effects for treatment/sex and treatment time/sex interactions (significance was accepted at 0.05). Finally, dimensionality reduction for bone morphology (by micro-CT), histomorphometry, serum markers of bone remodeling, mechanical testing, and serum hormone measures, was performed using principal components analysis (PCA). Statistical significance (pre-adjustment) was set at  $p < 0.05$ . Analysis was conducted in R Statistical Software (v.4.1.2; R Core Team 2023).

|                       | CTL M                 | CANA M               | CTL F                | CANA F               |      | main effects |           | interactions    |
|-----------------------|-----------------------|----------------------|----------------------|----------------------|------|--------------|-----------|-----------------|
|                       | N=16                  | N=20                 | N=17                 | N=25                 |      | Sex:M        | TxCANA    | sexM:<br>TxCANA |
| Insulin pg/ml         | 365.722<br>214.671    | 161.001<br>49.924    | 176.387<br>39.264    | 138.599<br>68.566    | Est. | 92.120       | -114.930  | -166.930        |
|                       |                       |                      |                      |                      | SE   | 26.700       | 26.990    | 50.800          |
|                       |                       |                      |                      |                      | P    | P<0.001      | P<0.0001  | P<0.01          |
| Glucagon pg/ml        | 9.912<br>3.685        | 12.904<br>4.883      | 19.146<br>16.558     | 34.670<br>31.056     | Est. | -16.191      | 9.761     | -12.532         |
|                       |                       |                      |                      |                      | SE   | 4.573        | 4.586     | 9.147           |
|                       |                       |                      |                      |                      | P    | P<0.001      | P<0.05    | 0.175           |
| Insulin/glucagon      | 39.337<br>23.627      | 13.702<br>5.075      | 12.469<br>5.472      | 6.200<br>4.997       | Est. | 15.818       | -15.179   | -19.366         |
|                       |                       |                      |                      |                      | SE   | 2.943        | 2.964     | 5.517           |
|                       |                       |                      |                      |                      | P    | P<0.0001     | P<0.0001  | P<0.001         |
| Leptin pg/ml          | 13380.550<br>5641.983 | 3371.070<br>2320.836 | 5589.573<br>2451.231 | 2920.785<br>1922.156 | Est. | 3628.400     | -6059.400 | -7340.700       |
|                       |                       |                      |                      |                      | SE   | 847.200      | 852.400   | 1491.700        |
|                       |                       |                      |                      |                      | P    | P<0.0001     | P<0.0001  | P<0.0001        |
| Active GLP-1<br>p/mol | 0.123<br>0.057        | 0.210<br>0.164       | 0.148<br>0.077       | 0.172<br>0.131       | Est. | 0.011        | 0.053     | 0.062           |
|                       |                       |                      |                      |                      | SE   | 0.027        | 0.028     | 0.055           |
|                       |                       |                      |                      |                      | P    | 0.692        | 0.056     | 0.264           |
| IL-6 pg/ml            | 15.216<br>9.998       | 23.562<br>17.521     | 12.199<br>7.675      | 10.782<br>8.797      | Est. | 8.746        | 3.039     | 9.762           |
|                       |                       |                      |                      |                      | SE   | 2.798        | 2.831     | 5.602           |
|                       |                       |                      |                      |                      | P    | P<0.01       | 0.287     | 0.086           |
| MCP-1 pg/ml           | 19.504<br>5.875       | 17.745<br>6.315      | 31.852<br>11.523     | 22.975<br>12.381     | Est. | -8.343       | -5.560    | 7.118           |
|                       |                       |                      |                      |                      | SE   | 2.275        | 2.288     | 4.541           |
|                       |                       |                      |                      |                      | P    | P<0.001      | P<0.05    | 0.121           |
| TNF-a pg/ml           | 6.765<br>2.074        | 4.694<br>1.168       | 6.911<br>1.576       | 5.096<br>1.571       | Est. | -0.292       | -1.936    | -0.256          |
|                       |                       |                      |                      |                      | SE   | 0.364        | 0.367     | 0.739           |
|                       |                       |                      |                      |                      | P    | 0.424        | P<0.0001  | 0.730           |

**Supplementary Table 1:** Serum levels of metabolic hormones and inflammatory markers after 6 months of CANA treatment. Descriptive statistics (means (top number), standard deviations (bottom number)) were computed for each hormone. Statistical significance for main effects of sex (M) and treatment (Tx) was determined through comparisons to the Bonferroni-adjusted significance level (.0004). Fibroblast growth factor-23 (FGF23), monocyte chemotactic protein-1 (MCP-1), interleukine-6 (IL6), Tumor necrosis factor-a (TNF-a). Estimated value (Est), standard error (SE), p value (P).

|                      | CTL Males                      |                                |                                |                                 | CANA Males                     |                                |                                 | CTL Females                    |                                |                                |                                 | CANA Females                   |                                |                                 | Main effects |          |        |                     | Interactions        |             |                               |                               |
|----------------------|--------------------------------|--------------------------------|--------------------------------|---------------------------------|--------------------------------|--------------------------------|---------------------------------|--------------------------------|--------------------------------|--------------------------------|---------------------------------|--------------------------------|--------------------------------|---------------------------------|--------------|----------|--------|---------------------|---------------------|-------------|-------------------------------|-------------------------------|
|                      | Age: 6m<br>TX time: 0m<br>n=18 | Age: 7m<br>TX time: 1m<br>n=19 | Age: 9m<br>TX time: 3m<br>n=23 | Age: 12m<br>TX time: 6m<br>n=19 | Age: 7m<br>TX time: 1m<br>n=20 | Age: 9m<br>TX time: 3m<br>n=28 | Age: 12m<br>TX time: 6m<br>n=22 | Age: 6m<br>TX time: 0m<br>n=19 | Age: 7m<br>TX time: 1m<br>n=19 | Age: 9m<br>TX time: 3m<br>n=14 | Age: 12m<br>TX time: 6m<br>n=30 | Age: 7m<br>TX time: 1m<br>n=22 | Age: 9m<br>TX time: 3m<br>n=15 | Age: 12m<br>TX time: 6m<br>n=44 |              | sexM     | TxCANA | Tx time<br>months`3 | Tx time<br>months`6 | sexM:TxCANA | Sex(M);Tx<br>time<br>months`3 | Sex(M);Tx<br>time<br>months`6 |
| Ec.MS/BS             | 0.516                          | 0.259                          | 0.205                          | 0.363                           | 0.361                          | 0.194                          | 0.367                           | 0.553                          | 0.377                          | 0.329                          | 0.455                           | 0.379                          | 0.335                          | 0.463                           | Est          | -0.096   | 0.015  | -0.084              | 0.067               | 0.021       | -0.067                        | -0.027                        |
|                      | 0.117                          | 0.140                          | 0.152                          | 0.124                           | 0.085                          | 0.153                          | 0.128                           | 0.125                          | 0.097                          | 0.145                          | 0.105                           | 0.104                          | 0.101                          | 0.119                           | SE           | 0.015    | 0.015  | 0.020               | 0.018               | 0.030       | 0.040                         | 0.037                         |
|                      |                                |                                |                                |                                 |                                |                                |                                 |                                |                                |                                |                                 |                                |                                |                                 | P            | P<0.0001 | 0.303  | P<0.0001            | P<0.001             | 0.479       | 0.091                         | 0.456                         |
| Ec.MAR<br>Um/day     | 0.774                          | 0.234                          | 0.262                          | 0.545                           | 0.332                          | 0.281                          | 0.452                           | 0.821                          | 0.326                          | 0.353                          | 0.632                           | 0.337                          | 0.370                          | 0.563                           | Est          | -0.080   | -0.011 | 0.008               | 0.238               | 0.034       | -0.042                        | -0.049                        |
|                      | 0.182                          | 0.179                          | 0.125                          | 0.144                           | 0.179                          | 0.111                          | 0.101                           | 0.198                          | 0.164                          | 0.113                          | 0.179                           | 0.169                          | 0.101                          | 0.178                           | SE           | 0.019    | 0.019  | 0.025               | 0.023               | 0.037       | 0.050                         | 0.046                         |
|                      |                                |                                |                                |                                 |                                |                                |                                 |                                |                                |                                |                                 |                                |                                |                                 | P            | P<0.0001 | 0.547  | 0.732               | P<0.0001            | 0.362       | 0.404                         | 0.289                         |
| Ec.BFR<br>Um/day*100 | 39.519                         | 7.452                          | 6.016                          | 20.736                          | 12.006                         | 6.400                          | 16.702                          | 46.089                         | 12.709                         | 12.020                         | 29.161                          | 13.044                         | 12.784                         | 27.049                          | Est          | -6.522   | -0.261 | -1.925              | 12.359              | 0.888       | -3.069                        | -6.242                        |
|                      | 11.535                         | 8.083                          | 5.883                          | 10.536                          | 7.361                          | 5.332                          | 7.036                           | 16.863                         | 6.634                          | 6.397                          | 11.411                          | 7.831                          | 5.892                          | 13.248                          | SE           | 1.123    | 1.097  | 1.440               | 1.326               | 2.200       | 2.900                         | 2.665                         |
|                      |                                |                                |                                |                                 |                                |                                |                                 |                                |                                |                                |                                 |                                |                                |                                 | P            | P<0.0001 | 0.812  | 0.182               | P<0.0001            | 0.687       | 0.291                         | P<0.05                        |
| P.MS/BS              | 0.806                          | 0.704                          | 0.400                          | 0.624                           | 0.636                          | 0.411                          | 0.598                           | 0.803                          | 0.626                          | 0.488                          | 0.739                           | 0.672                          | 0.423                          | 0.732                           | Est          | -0.059   | -0.013 | -0.227              | 0.024               | -0.025      | -0.066                        | -0.144                        |
|                      | 0.115                          | 0.129                          | 0.116                          | 0.234                           | 0.154                          | 0.112                          | 0.138                           | 0.120                          | 0.169                          | 0.104                          | 0.166                           | 0.122                          | 0.077                          | 0.191                           | SE           | 0.019    | 0.019  | 0.025               | 0.023               | 0.038       | 0.049                         | 0.045                         |
|                      |                                |                                |                                |                                 |                                |                                |                                 |                                |                                |                                |                                 |                                |                                |                                 | P            | P<0.01   | 0.499  | P<0.0001            | 0.300               | 0.513       | 0.183                         | P<0.01                        |
| P.MAR<br>Um/day      | 0.996                          | 0.558                          | 0.562                          | 0.514                           | 0.381                          | 0.513                          | 0.436                           | 0.763                          | 0.538                          | 0.613                          | 0.437                           | 0.466                          | 0.702                          | 0.448                           | Est          | -0.035   | -0.047 | 0.103               | -0.032              | -0.097      | -0.090                        | 0.059                         |
|                      | 0.143                          | 0.164                          | 0.140                          | 0.153                           | 0.067                          | 0.091                          | 0.092                           | 0.129                          | 0.094                          | 0.202                          | 0.079                           | 0.139                          | 0.160                          | 0.101                           | SE           | 0.016    | 0.016  | 0.021               | 0.019               | 0.031       | 0.041                         | 0.037                         |
|                      |                                |                                |                                |                                 |                                |                                |                                 |                                |                                |                                |                                 |                                |                                |                                 | P            | P<0.05   | P<0.01 | P<0.0001            | 0.09371 .           | P<0.01      | P<0.05                        | 0.116                         |
| P.BFR<br>Um/day*100  | 81.088                         | 38.693                         | 22.836                         | 34.889                          | 24.784                         | 21.443                         | 26.672                          | 60.511                         | 33.948                         | 29.440                         | 32.997                          | 31.499                         | 29.853                         | 33.786                          | Est          | -3.787   | -3.672 | -6.677              | -0.025              | -7.043      | -6.308                        | -2.036                        |
|                      | 20.157                         | 13.331                         | 9.724                          | 15.596                          | 9.064                          | 7.130                          | 10.322                          | 9.736                          | 11.357                         | 10.763                         | 11.648                          | 11.608                         | 8.808                          | 14.071                          | SE           | 1.458    | 1.424  | 1.869               | 1.721               | 2.824       | 3.782                         | 3.476                         |
|                      |                                |                                |                                |                                 |                                |                                |                                 |                                |                                |                                |                                 |                                |                                |                                 | P            | P<0.01   | P<0.05 | P<0.001             | 0.988               | P<0.05      | 0.097                         | 0.559                         |

**Supplementary Table 2: Cortical bone histomorphometry (femur mid-diaphysis).** Right femurs were cleaned of excess soft tissues, infiltrated, and embedded in Technovit Resin (Technovit 7200 VLC ). Embedded samples were cut using a diamond-coated wafering saw (IsoMet® 5000, Buehler, Lake Bluff, IL) at the mid-diaphysis. The block with the bone surface was mounted onto a strain-free Exakt plastic slide (Exakt Technologies, Oklahoma City, Okla., USA), thin sectioned with the Buehler IsoMet® 5000, and polished on an automated Exakt 400 CS Grinding System with 1,200-grit paper until plane parallel at a thickness of 50 µm. Sections were mounted on plastic slides, and images at 0.316µm/pixel resolution were acquired with a 20X magnification objective using fluorescence microscopy with a Leica-Leitz DMRXE Universal Microscope configured with a Marzhauser motorized stage and Leica 20X objective lens (Leica Microsystems, Bannockburn, Ill., USA). Our principal focus was mineral surface/bone surface (MS/BS, %), bone formation rate (BFR um/day x 100), and mineral apposition rate (MAR um/day) in the endosteal (Ec) or periosteal (Ps) cortical bone surfaces. All measurements were carried out by a single observer, who was blinded to specimen identity, using a BIOQUANT Osteo Measure system (Osteometrics, Atlanta, GA, USA), by standard protocols.

Descriptive statistics (means (top number), standard deviations (bottom number)) were computed for each hormone. Statistical significance for main effects of sex (M) and treatment (Tx) was determined through comparisons to the Bonferroni-adjusted significance level (.0004). Endosteal mineralized surface per bone surface (Ec MS/BS), endosteal mineral apposition rate (Ec.MAR), endosteal bone formation rate (Ec.BFR). Periosteal mineralized surface per bone surface (Ps MS/BS), periosteal mineral apposition rate (Ps.MAR), periosteal bone formation rate (Ps.BFR). Estimated value (Est), standard error (SE), p value (P).

|                | CTL Males                      |                                |                                 | CANA Males                     |                                |                                 | CTL Females                    |                                |                                 | CANA Females                   |                                |                                 |     | Main effects |        |                      |                      | Interactions    |                                 |                                 |
|----------------|--------------------------------|--------------------------------|---------------------------------|--------------------------------|--------------------------------|---------------------------------|--------------------------------|--------------------------------|---------------------------------|--------------------------------|--------------------------------|---------------------------------|-----|--------------|--------|----------------------|----------------------|-----------------|---------------------------------|---------------------------------|
|                | Age: 7m<br>TX time: 1m<br>n=20 | Age: 9m<br>TX time: 3m<br>n=25 | Age: 12m<br>TX time: 6m<br>n=20 | Age: 7m<br>TX time: 1m<br>n=19 | Age: 9m<br>TX time: 3m<br>n=30 | Age: 12m<br>TX time: 6m<br>n=25 | Age: 7m<br>TX time: 1m<br>n=19 | Age: 9m<br>TX time: 3m<br>n=15 | Age: 12m<br>TX time: 6m<br>n=30 | Age: 7m<br>TX time: 1m<br>n=25 | Age: 9m<br>TX time: 3m<br>n=15 | Age: 12m<br>TX time: 6m<br>n=25 |     | sexM         | TxCANA | Tx time<br>months' 3 | Tx time<br>months' 6 | sexM:<br>TxCANA | Sex(M);<br>Tx time<br>months' 3 | Sex(M);<br>Tx time<br>months' 6 |
| CTX<br>ng/ml   | 0.780                          | 0.885                          | 0.795                           | 0.692                          | 0.772                          | 0.713                           | 0.761                          | 0.839                          | 0.743                           | 0.733                          | 0.743                          | 0.759                           | Est | 0.007        | -0.060 | 0.069                | 0.007                | -0.070          | 0.046                           | 0.015                           |
|                | 0.134                          | 0.131                          | 0.146                           | 0.120                          | 0.161                          | 0.188                           | 0.111                          | 0.110                          | 0.223                           | 0.074                          | 0.128                          | 0.104                           | SE  | 0.018        | 0.018  | 0.023                | 0.021                | 0.036           | 0.047                           | 0.044                           |
|                |                                |                                |                                 |                                |                                |                                 |                                |                                |                                 |                                |                                |                                 | P   | 0.699        | P<0.01 | P<0.01               | 0.723                | 0.052           | 0.322                           | 0.729                           |
| P1NP<br>ng/ml  | 31.766                         | 26.271                         | 18.505                          | 23.814                         | 15.872                         | 23.141                          | 2.366                          | 31.311                         | 30.745                          | 2.537                          | 19.199                         | 25.293                          | Est | 4.058        | -5.957 | 7.092                | 10.816               | 11.610          | -29.630                         | -31.420                         |
|                | 22.301                         | 24.236                         | 22.423                          | 22.670                         | 10.819                         | 21.919                          | 1.980                          | 21.584                         | 20.566                          | 1.560                          | 12.186                         | 17.210                          | SE  | 2.445        | 2.411  | 3.085                | 2.924                | 4.843           | 5.853                           | 5.509                           |
|                |                                |                                |                                 |                                |                                |                                 |                                |                                |                                 |                                |                                |                                 | P   | 0.098135     | P<0.05 | P<0.05               | P<0.001              | 0.981           | P<0.0001                        | P<0.0001                        |
| PTH<br>ng/ml   | 0.409                          | 0.266                          | 0.508                           | 0.485                          | 0.360                          | 0.466                           | 0.512                          | 0.427                          | 0.693                           | 0.519                          | 0.412                          | 0.672                           | Est | -0.125       | 0.016  | -0.107               | 0.102                | 0.055           | -0.032                          | -0.134                          |
|                | 0.090                          | 0.068                          | 0.119                           | 0.130                          | 0.080                          | 0.169                           | 0.151                          | 0.100                          | 0.206                           | 0.137                          | 0.120                          | 0.161                           | SE  | 0.017        | 0.017  | 0.021                | 0.021                | 0.035           | 0.043                           | 0.042                           |
|                |                                |                                |                                 |                                |                                |                                 |                                |                                |                                 |                                |                                |                                 | P   | P<0.0001     | 0.350  | P<0.0001             | P<0.0001             | 0.117           | 0.455                           | P<0.01                          |
| FGF23<br>ng/ml | 0.137                          |                                | 0.216                           | 0.120                          |                                | 0.301                           | 0.215                          |                                | 0.412                           | 0.170                          |                                | 0.463                           | Est | -0.119       | 0.018  | 0.195                |                      | 0.026           |                                 | -0.119                          |
|                | 0.095                          |                                | 0.049                           | 0.073                          |                                | 0.119                           | 0.155                          |                                | 0.160                           | 0.122                          |                                | 0.207                           | SE  | 0.022        | 0.022  | 0.022                |                      | 0.044           |                                 | 0.043                           |
|                |                                |                                |                                 |                                |                                |                                 |                                |                                |                                 |                                |                                |                                 | P   | P<0.0001     | 0.408  | P<0.0001             |                      | 0.554           |                                 | P<0.01                          |

**Supplementary Table 3: Serum levels of bone remodeling markers.** Descriptive statistics (means (top number), standard deviations (bottom number)) were computed for each marker. Statistical significance for main effects of sex (M) and treatment (Tx) was determined through comparisons to the Bonferroni-adjusted significance level (.0004). crosslinked C-terminal telopeptides of type I collagen (CTX), procollagen type 1 N-terminal pro-peptide (P1NP), parathyroid hormone (PTH). Estimated value (Est), standard error (SE), p value (P).

|                            | CTL Males                      |                                |                                |                                 | CANA Males                     |                                |                                 | CTL Females                    |                                |                                |                                 | CANA Females                   |                                |                                 |     | Main effects |        |                     |                     | Interactions    |                               |                               |
|----------------------------|--------------------------------|--------------------------------|--------------------------------|---------------------------------|--------------------------------|--------------------------------|---------------------------------|--------------------------------|--------------------------------|--------------------------------|---------------------------------|--------------------------------|--------------------------------|---------------------------------|-----|--------------|--------|---------------------|---------------------|-----------------|-------------------------------|-------------------------------|
|                            | Age: 6m<br>TX time: 0m<br>n=18 | Age: 7m<br>TX time: 1m<br>n=20 | Age: 9m<br>TX time: 3m<br>n=23 | Age: 12m<br>TX time: 6m<br>n=20 | Age: 7m<br>TX time: 1m<br>n=20 | Age: 9m<br>TX time: 3m<br>n=30 | Age: 12m<br>TX time: 6m<br>n=22 | Age: 6m<br>TX time: 0m<br>n=19 | Age: 7m<br>TX time: 1m<br>n=19 | Age: 9m<br>TX time: 3m<br>n=15 | Age: 12m<br>TX time: 6m<br>n=30 | Age: 7m<br>TX time: 1m<br>n=24 | Age: 9m<br>TX time: 3m<br>n=15 | Age: 12m<br>TX time: 6m<br>n=44 |     | sexM         | TxCANA | Tx time<br>months'3 | Tx time<br>months'6 | sexM:<br>TxCANA | Sex(M);Tx<br>time<br>months'3 | Sex(M);Tx<br>time<br>months'6 |
| BV/TV, %                   | 61.062                         | 62.665                         | 60.163                         | 59.294                          | 63.268                         | 60.463                         | 59.287                          | 62.710                         | 66.294                         | 62.555                         | 61.147                          | 63.432                         | 64.891                         | 63.038                          | Est | -2.698       | 0.420  | -1.887              | -3.011              | -0.303          | -1.716                        | -1.245                        |
|                            | 2.442                          | 3.222                          | 4.615                          | 3.772                           | 3.958                          | 3.306                          | 4.622                           | 2.640                          | 3.951                          | 4.509                          | 4.185                           | 3.861                          | 5.123                          | 4.897                           | SE  | 0.522        | 0.511  | 0.667               | 0.616               | 1.025           | 1.353                         | 1.247                         |
|                            |                                |                                |                                |                                 |                                |                                |                                 |                                |                                |                                |                                 |                                |                                |                                 | P   | P<0.0001     | 0.412  | P<0.01              | P<0.0001            | 0.768           | 0.206                         | 0.319                         |
| T.Ar,<br>mm^2              | 1.708                          | 1.743                          | 1.711                          | 1.935                           | 1.662                          | 1.709                          | 1.838                           | 1.443                          | 1.475                          | 1.578                          | 1.657                           | 1.512                          | 1.512                          | 1.642                           | Est | 0.205        | -0.033 | 0.023               | 0.164               | -0.044          | -0.039                        | 0.028                         |
|                            | 0.125                          | 0.150                          | 0.125                          | 0.183                           | 0.166                          | 0.152                          | 0.178                           | 0.111                          | 0.142                          | 0.111                          | 0.155                           | 0.137                          | 0.131                          | 0.144                           | SE  | 0.018        | 0.018  | 0.024               | 0.022               | 0.036           | 0.048                         | 0.044                         |
|                            |                                |                                |                                |                                 |                                |                                |                                 |                                |                                |                                |                                 |                                |                                |                                 | P   | P<0.0001     | 0.0657 | 0.325               | P<0.0001            | 0.223           | 0.419                         | 0.520                         |
| B.Ar,<br>mm^2              | 1.042                          | 1.091                          | 1.026                          | 1.146                           | 1.049                          | 1.031                          | 1.087                           | 0.904                          | 0.976                          | 0.985                          | 1.011                           | 0.957                          | 0.981                          | 1.035                           | Est | 0.081        | -0.012 | -0.016              | 0.052               | -0.035          | -0.057                        | -0.015                        |
|                            | 0.081                          | 0.092                          | 0.066                          | 0.121                           | 0.098                          | 0.078                          | 0.112                           | 0.071                          | 0.09                           | 0.074                          | 0.095                           | 0.085                          | 0.113                          | 0.120                           | SE  | 0.012        | 0.012  | 0.015               | 0.014               | 0.024           | 0.031                         | 0.029                         |
|                            |                                |                                |                                |                                 |                                |                                |                                 |                                |                                |                                |                                 |                                |                                |                                 | P   | P<0.0001     | 0.295  | 0.294               | P<0.001             | 0.145           | 0.06765                       | 0.611                         |
| MMI(polar),<br>mm^4        | 0.426                          | 0.453                          | 0.422                          | 0.531                           | 0.415                          | 0.424                          | 0.478                           | 0.299                          | 0.322                          | 0.354                          | 0.380                           | 0.331                          | 0.333                          | 0.381                           | Est | 0.105        | -0.015 | -0.001              | 0.060               | -0.025          | -0.026                        | 0.015                         |
|                            | 0.060                          | 0.074                          | 0.054                          | 0.098                           | 0.080                          | 0.068                          | 0.084                           | 0.045                          | 0.056                          | 0.043                          | 0.07                            | 0.057                          | 0.061                          | 0.066                           | SE  | 0.009        | 0.008  | 0.011               | 0.010               | 0.017           | 0.022                         | 0.020                         |
|                            |                                |                                |                                |                                 |                                |                                |                                 |                                |                                |                                |                                 |                                |                                |                                 | P   | P<0.0001     | 0.0837 | 0.959               | P<0.0001            | 0.137           | 0.238                         | 0.466                         |
| Cs.Th,<br>mm               | 0.242                          | 0.252                          | 0.236                          | 0.245                           | 0.250                          | 0.237                          | 0.243                           | 0.241                          | 0.263                          | 0.251                          | 0.252                           | 0.251                          | 0.257                          | 0.261                           | Est | -0.012       | 0.001  | -0.009              | -0.003              | -0.003          | -0.012                        | -0.008                        |
|                            | 0.016                          | 0.016                          | 0.018                          | 0.017                           | 0.020                          | 0.014                          | 0.025                           | 0.014                          | 0.021                          | 0.020                          | 0.021                           | 0.019                          | 0.027                          | 0.028                           | SE  | 0.003        | 0.003  | 0.003               | 0.003               | 0.005           | 0.007                         | 0.006                         |
|                            |                                |                                |                                |                                 |                                |                                |                                 |                                |                                |                                |                                 |                                |                                |                                 | P   | P<0.0001     | 0.792  | P<0.01              | 0.413               | 0.540           | 0.0727                        | 0.208                         |
| TMD,<br>g/cc               | 1.302                          | 1.380                          | 1.406                          | 1.454                           | 1.375                          | 1.420                          | 1.439                           | 1.331                          | 1.411                          | 1.412                          | 1.456                           | 1.417                          | 1.423                          | 1.443                           | Est | -0.013       | -0.001 | 0.021               | 0.050               | 0.002           | 0.033                         | 0.035                         |
|                            | 0.029                          | 0.039                          | 0.032                          | 0.033                           | 0.037                          | 0.034                          | 0.031                           | 0.025                          | 0.021                          | 0.028                          | 0.028                           | 0.022                          | 0.036                          | 0.031                           | SE  | 0.004        | 0.004  | 0.005               | 0.005               | 0.008           | 0.010                         | 0.009                         |
|                            |                                |                                |                                |                                 |                                |                                |                                 |                                |                                |                                |                                 |                                |                                |                                 | P   | P<0.001      | 0.774  | P<0.0001            | P<0.0001            | 0.800           | P<0.01                        | P<0.001                       |
| Ma.Ar,<br>mm^2             | 0.666                          | 0.652                          | 0.685                          | 0.789                           | 0.613                          | 0.678                          | 0.751                           | 0.539                          | 0.499                          | 0.593                          | 0.646                           | 0.555                          | 0.531                          | 0.607                           | Est | 0.124        | -0.021 | 0.039               | 0.112               | -0.009          | 0.019                         | 0.043                         |
|                            | 0.071                          | 0.093                          | 0.113                          | 0.114                           | 0.108                          | 0.105                          | 0.130                           | 0.062                          | 0.087                          | 0.098                          | 0.109                           | 0.092                          | 0.090                          | 0.100                           | SE  | 0.013        | 0.013  | 0.016               | 0.015               | 0.025           | 0.033                         | 0.031                         |
|                            |                                |                                |                                |                                 |                                |                                |                                 |                                |                                |                                |                                 |                                |                                |                                 | P   | P<0.0001     | 0.0988 | P<0.05              | P<0.0001            | 0.710           | 0.572                         | 0.162                         |
| Length,<br>mm              | 15.776                         | 16.085                         | 16.101                         | 16.182                          | 16.030                         | 16.149                         | 16.157                          | 15.571                         | 16.022                         | 16.068                         | 16.353                          | 16.006                         | 15.979                         | 16.212                          | Est | 0.002        | -0.046 | 0.057               | 0.201               | 0.085           | 0.066                         | -0.147                        |
|                            | 0.338                          | 0.163                          | 0.309                          | 0.476                           | 0.113                          | 0.260                          | 0.504                           | 0.240                          | 0.174                          | 0.354                          | 0.485                           | 0.184                          | 0.219                          | 0.420                           | SE  | 0.043        | 0.043  | 0.056               | 0.052               | 0.085           | 0.113                         | 0.104                         |
|                            |                                |                                |                                |                                 |                                |                                |                                 |                                |                                |                                |                                 |                                |                                |                                 | P   | 0.969        | 0.276  | 0.312               | P<0.001             | 0.317           | 0.561                         | 0.159                         |
| Robustness,<br>T.Ar/Length | 0.108                          | 0.108                          | 0.106                          | 0.120                           | 0.104                          | 0.106                          | 0.114                           | 0.093                          | 0.092                          | 0.098                          | 0.101                           | 0.096                          | 0.095                          | 0.101                           | Est | 0.013        | -0.002 | 0.001               | 0.009               | -0.003          | -0.002                        | 0.003                         |
|                            | 0.008                          | 0.009                          | 0.009                          | 0.01                            | 0.010                          | 0.009                          | 0.009                           | 0.007                          | 0.009                          | 0.006                          | 0.010                           | 0.008                          | 0.008                          | 0.008                           | SE  | 0.001        | 0.001  | 0.001               | 0.001               | 0.002           | 0.003                         | 0.003                         |
|                            |                                |                                |                                |                                 |                                |                                |                                 |                                |                                |                                |                                 |                                |                                |                                 | P   | P<0.0001     | 0.146  | 0.565               | P<0.0001            | 0.115           | 0.437                         | 0.245                         |

**Supplementary Table 4: Cortical bone morphology of the femur by micro-CT.** Cortical bone parameters were taken at the femur mid diaphysis. Images were acquired utilizing a SkyScan 1172 high-resolution scanner (MicroPhotonics), using a 10 MP digital detector, 10W power energy (60 KV and 167 mA), and a 0.5 mm aluminum filter with 9.7 µm image voxel size. Descriptive statistics (means (top number), standard deviations (bottom number)) were computed for each outcome. Statistical significance for main effects of sex and treatment (Tx) was determined through comparisons to the Bonferroni-adjusted significance level (.0004). Total cross-sectional area (T.Ar), bone area (B.Ar), marrow area (M.Ar), polar moment of inertia (MMI), cortical bone thickness (Ct.Th), bone tissue mineral density (TMD). Estimated value (Est), standard Error (SE), p value (P).

|                                       | Basal M                     | CTL M                        | CANA M                       | Basal F                     | CTL F                        | CANA F                       |     | Main effects      |                | Interactions    |
|---------------------------------------|-----------------------------|------------------------------|------------------------------|-----------------------------|------------------------------|------------------------------|-----|-------------------|----------------|-----------------|
|                                       | Age:6m Tx<br>time:0<br>N=14 | Age:12m Tx<br>time:6<br>N=18 | Age:12m Tx<br>time:6<br>N=20 | Age:6m Tx<br>time:0<br>N=14 | Age:12m Tx<br>time:6<br>N=30 | Age:12m Tx<br>time:6<br>N=20 |     | sexM              | TxCANA         | sexM:<br>TxCANA |
| Max load, N                           | 19.605<br>2.339             | 21.168<br>3.367              | 19.363<br>2.873              | 17.676<br>2.477             | 18.960<br>4.018              | 19.280<br>4.664              | Est | 1.2081            | -0.6179        | -2.124          |
|                                       |                             |                              |                              |                             |                              |                              | SE  | 0.8335            | 0.8292         | 1.6638          |
|                                       |                             |                              |                              |                             |                              |                              | P   | <b>0.151</b>      | <b>0.458</b>   | <b>0.2053</b>   |
| Stiffness,<br>N/mm                    | 58.721<br>10.565            | 92.916<br>21.879             | 98.031<br>20.490             | 60.130<br>15.113            | 84.753<br>25.057             | 96.332<br>30.898             | Est | 5.121             | 8.727          | -6.464          |
|                                       |                             |                              |                              |                             |                              |                              | SE  | 5.401             | 5.372          | 10.861          |
|                                       |                             |                              |                              |                             |                              |                              | P   | <b>0.346</b>      | <b>0.108</b>   | <b>0.553</b>    |
| Elastic<br>modulus,<br>N/mm^2,<br>Mpa | 11722.109<br>2862.653       | 16056.186<br>4567.630        | 18103.817<br>3664.833        | 16463.799<br>4222.791       | 20667.859<br>6300.230        | 23247.518<br>7063.737        | Est | -4862             | 2344.9         | -532            |
|                                       |                             |                              |                              |                             |                              |                              | SE  | 1225              | 1218.6         | 2468            |
|                                       |                             |                              |                              |                             |                              |                              | P   | <b>P&lt;0.001</b> | <b>0.05766</b> | <b>0.82985</b>  |

**Supplementary Table 5: Whole bone mechanical testing by 3-point bending assay (femur).** A three-point bending test was performed to evaluate and quantify the mechanical properties of 6 months basal femur bone - male (n=14) and female (n=14) and 12 months control (male n=18, female n=30) and CANA-treated femurs (male n=20, female n=20). The testing used a rheometer (Discovery HR-2, TA instruments, New Castle, DE USA) with a 10mm three-point bending fixture frame. The femur bones were placed with supports at the distal and proximal ends. The machine was programmed to apply a uniaxial load until failure to the mid-femoral shaft at a 0.05mm/sec rate. The software collected the ultimate load (N) and displacement and calculated the modulus of elasticity € using:

$$E = \frac{KL^3}{(48I)}$$

Eq. (1)

Where K is the stiffness, L is the span length, and I is the moment of inertia [J Bone Miner Res, 2022. **37**(11): p. 2201-2214 ].

Descriptive statistics (means (top number), standard deviations (bottom number)) were computed for each hormone. Statistical significance for main effects of sex (M) and treatment (Tx) was determined through comparisons to the Bonferroni-adjusted significance level (.0004). Estimated value (Est), standard error (SE), p value (P).

|            | CTL Males                      |                                |                                |                                 | CANA Males                     |                                |                                 | CTL Females                    |                                |                                |                                 | CANA Females                   |                                |                                 |     | Main effects       |                   |                     |                     | Interactions     |                                |                                |
|------------|--------------------------------|--------------------------------|--------------------------------|---------------------------------|--------------------------------|--------------------------------|---------------------------------|--------------------------------|--------------------------------|--------------------------------|---------------------------------|--------------------------------|--------------------------------|---------------------------------|-----|--------------------|-------------------|---------------------|---------------------|------------------|--------------------------------|--------------------------------|
|            | Age: 6m<br>TX time: 0m<br>n=18 | Age: 7m<br>TX time: 1m<br>n=20 | Age: 9m<br>TX time: 3m<br>n=23 | Age: 12m<br>TX time: 6m<br>n=20 | Age: 7m<br>TX time: 1m<br>n=20 | Age: 9m<br>TX time: 3m<br>n=30 | Age: 12m<br>TX time: 6m<br>n=22 | Age: 6m<br>TX time: 0m<br>n=19 | Age: 7m<br>TX time: 1m<br>n=19 | Age: 9m<br>TX time: 3m<br>n=15 | Age: 12m<br>TX time: 6m<br>n=30 | Age: 7m<br>TX time: 1m<br>n=24 | Age: 9m<br>TX time: 3m<br>n=15 | Age: 12m<br>TX time: 6m<br>n=44 |     | sexM               | TxCANA            | Tx time<br>months'3 | Tx time<br>months'6 | sexM:<br>TxCANA  | Sex(M);<br>Tx time<br>months'3 | Sex(M);<br>Tx time<br>months'6 |
| BV/TV, %   | 14.747                         | 15.685                         | 11.519                         | 11.050                          | 13.648                         | 10.771                         | 9.400                           | 7.231                          | 9.722                          | 5.349                          | 3.989                           | 8.619                          | 8.405                          | 5.087                           | Est | 5.161              | -0.273            | -3.020              | -4.508              | -2.260           | -1.312                         | -0.020                         |
|            | 4.078                          | 3.678                          | 3.130                          | 5.163                           | 5.015                          | 4.733                          | 3.545                           | 3.089                          | 5.927                          | 3.637                          | 2.895                           | 3.460                          | 4.597                          | 3.369                           | SE  | 0.504              | 0.493             | 0.644               | 0.595               | 0.980            | 1.307                          | 1.205                          |
|            |                                |                                |                                |                                 |                                |                                |                                 |                                |                                |                                |                                 |                                |                                |                                 | P   | <b>P&lt;0.0001</b> | <b>0.581</b>      | <b>P&lt;0.0001</b>  | <b>P&lt;0.0001</b>  | <b>P&lt;0.05</b> | <b>0.317</b>                   | <b>0.987</b>                   |
| Tb.Th, mm  | 0.067                          | 0.067                          | 0.065                          | 0.069                           | 0.066                          | 0.068                          | 0.072                           | 0.063                          | 0.068                          | 0.066                          | 0.065                           | 0.068                          | 0.069                          | 0.071                           | Est | 0.000              | 0.003             | 0.000               | 0.002               | -0.002           | 0.001                          | 0.004                          |
|            | 0.004                          | 0.004                          | 0.005                          | 0.005                           | 0.004                          | 0.006                          | 0.004                           | 0.005                          | 0.008                          | 0.008                          | 0.009                           | 0.007                          | 0.009                          | 0.008                           | SE  | 0.001              | 0.001             | 0.001               | 0.001               | 0.002            | 0.002                          | 0.002                          |
|            |                                |                                |                                |                                 |                                |                                |                                 |                                |                                |                                |                                 |                                |                                |                                 | P   | <b>0.923</b>       | <b>P&lt;0.001</b> | <b>0.803</b>        | <b>P&lt;0.05</b>    | <b>0.226</b>     | <b>0.766</b>                   | <b>P&lt;0.05</b>               |
| Tb.Sp, mm  | 0.262                          | 0.259                          | 0.296                          | 0.313                           | 0.275                          | 0.318                          | 0.356                           | 0.379                          | 0.376                          | 0.457                          | 0.580                           | 0.371                          | 0.397                          | 0.525                           | Est | -0.152             | -0.008            | 0.053               | 0.131               | 0.066            | -0.011                         | -0.106                         |
|            | 0.034                          | 0.040                          | 0.065                          | 0.074                           | 0.062                          | 0.075                          | 0.065                           | 0.059                          | 0.104                          | 0.080                          | 0.190                           | 0.071                          | 0.098                          | 0.123                           | SE  | 0.013              | 0.013             | 0.016               | 0.015               | 0.025            | 0.033                          | 0.030                          |
|            |                                |                                |                                |                                 |                                |                                |                                 |                                |                                |                                |                                 |                                |                                |                                 | P   | <b>P&lt;0.0001</b> | <b>0.551</b>      | <b>P&lt;0.01</b>    | <b>P&lt;0.0001</b>  | <b>P&lt;0.01</b> | <b>0.725</b>                   | <b>P&lt;0.001</b>              |
| Tb.N, 1/mm | 2.204                          | 2.364                          | 1.767                          | 1.614                           | 2.077                          | 1.584                          | 1.296                           | 1.129                          | 1.370                          | 0.771                          | 0.580                           | 1.238                          | 1.168                          | 0.687                           | Est | 0.807              | -0.077            | -0.454              | -0.707              | -0.354           | -0.221                         | -0.121                         |
|            | 0.558                          | 0.568                          | 0.439                          | 0.774                           | 0.733                          | 0.652                          | 0.470                           | 0.419                          | 0.721                          | 0.438                          | 0.360                           | 0.418                          | 0.553                          | 0.398                           | SE  | 0.067              | 0.066             | 0.086               | 0.080               | 0.131            | 0.175                          | 0.161                          |
|            |                                |                                |                                |                                 |                                |                                |                                 |                                |                                |                                |                                 |                                |                                |                                 | P   | <b>P&lt;0.0001</b> | <b>0.244</b>      | <b>P&lt;0.0001</b>  | <b>P&lt;0.0001</b>  | <b>P&lt;0.01</b> | <b>0.207</b>                   | <b>0.452</b>                   |
| BMD, g/cc  | 0.134                          | 0.182                          | 0.143                          | 0.157                           | 0.162                          | 0.138                          | 0.134                           | 0.075                          | 0.131                          | 0.085                          | 0.078                           | 0.122                          | 0.119                          | 0.090                           | Est | 0.049              | -0.003            | -0.029              | -0.035              | -0.025           | -0.007                         | 0.014                          |
|            | 0.032                          | 0.033                          | 0.031                          | 0.048                           | 0.048                          | 0.046                          | 0.034                           | 0.026                          | 0.064                          | 0.038                          | 0.032                           | 0.036                          | 0.047                          | 0.037                           | SE  | 0.005              | 0.005             | 0.007               | 0.006               | 0.010            | 0.013                          | 0.012                          |
|            |                                |                                |                                |                                 |                                |                                |                                 |                                |                                |                                |                                 |                                |                                |                                 | P   | <b>P&lt;0.0001</b> | <b>0.614</b>      | <b>P&lt;0.0001</b>  | <b>P&lt;0.0001</b>  | <b>P&lt;0.05</b> | <b>0.574</b>                   | <b>0.263</b>                   |

**Supplementary Table 6: Trabecular bone morphology of the appendicular skeleton (femur) by micro-CT.** Trabecular bone parameters were taken at the femur distal metaphysis. Images were acquired utilizing a SkyScan 1172 high-resolution scanner (MicroPhotonics), using a 10 MP digital detector, 10W power energy (60 KV and 167 mA), and a 0.5 mm aluminum filter with 9.7 µm image voxel size. Descriptive statistics (means (top number), standard deviations (bottom number)) were computed for each outcome. Statistical significance for main effects of sex and treatment (Tx) was determined through comparisons to the Bonferroni-adjusted significance level (.0004). Bone volume per total volume (BV/TV), trabecular number (Tb.N), bone mineral density (BMD), trabecular spacing (Tb.Sp), trabecular thickness (Tb.Th). Estimated value (Est), standard error (SE), p value (P).

|                  | CTL Males                      |                                |                                |                                 | CANA Males                     |                                |                                 | CTL Females                    |                                |                                |                                 | CANA Females                   |                                |                                 |     | Main effects |         |                     |                     | Interactions    |                               |                               |
|------------------|--------------------------------|--------------------------------|--------------------------------|---------------------------------|--------------------------------|--------------------------------|---------------------------------|--------------------------------|--------------------------------|--------------------------------|---------------------------------|--------------------------------|--------------------------------|---------------------------------|-----|--------------|---------|---------------------|---------------------|-----------------|-------------------------------|-------------------------------|
|                  | Age: 6m<br>TX time: 0m<br>n=18 | Age: 7m<br>TX time: 1m<br>n=20 | Age: 9m<br>TX time: 3m<br>n=23 | Age: 12m<br>TX time: 6m<br>n=25 | Age: 7m<br>TX time: 1m<br>n=20 | Age: 9m<br>TX time: 3m<br>n=30 | Age: 12m<br>TX time: 6m<br>n=22 | Age: 6m<br>TX time: 0m<br>n=19 | Age: 7m<br>TX time: 1m<br>n=19 | Age: 9m<br>TX time: 3m<br>n=15 | Age: 12m<br>TX time: 6m<br>n=30 | Age: 7m<br>TX time: 1m<br>n=24 | Age: 9m<br>TX time: 3m<br>n=15 | Age: 12m<br>TX time: 6m<br>n=44 |     | sexM         | TxCANA  | Tx time<br>months'3 | Tx time<br>months'6 | sexM:TxCAN<br>A | Sex(M);Tx<br>time<br>months'3 | Sex(M);Tx<br>time<br>months'6 |
| L5 BV/TV,<br>%   | 24.190                         | 24.061                         | 23.617                         | 25.077                          | 22.722                         | 22.845                         | 23.784                          | 18.660                         | 19.108                         | 15.604                         | 17.536                          | 19.633                         | 20.793                         | 19.864                          | Est | 4.924        | 0.656   | -0.724              | 0.164               | -3.467          | 0.909                         | 1.462                         |
|                  | 3.017                          | 4.312                          | 3.197                          | 5.726                           | 4.190                          | 5.319                          | 4.165                           | 4.248                          | 4.587                          | 3.546                          | 5.559                           | 3.430                          | 5.173                          | 4.382                           | SE  | 0.549        | 0.542   | 0.729               | 0.653               | 1.069           | 1.482                         | 1.315                         |
|                  |                                |                                |                                |                                 |                                |                                |                                 |                                |                                |                                |                                 |                                |                                |                                 | P   | P<0.0001     | 0.228   | 0.321               | 0.802               | P<0.01          | 0.540                         | 0.267                         |
| L5 Tb.Th,<br>mm  | 0.068                          | 0.065                          | 0.064                          | 0.069                           | 0.064                          | 0.067                          | 0.070                           | 0.073                          | 0.073                          | 0.073                          | 0.076                           | 0.076                          | 0.076                          | 0.080                           | Est | -0.009       | 0.003   | 0.001               | 0.004               | -0.002          | 0.001                         | 0.001                         |
|                  | 0.004                          | 0.003                          | 0.004                          | 0.004                           | 0.004                          | 0.005                          | 0.004                           | 0.003                          | 0.006                          | 0.006                          | 0.005                           | 0.009                          | 0.007                          | 0.007                           | SE  | 0.001        | 0.001   | 0.001               | 0.001               | 0.001           | 0.002                         | 0.002                         |
|                  |                                |                                |                                |                                 |                                |                                |                                 |                                |                                |                                |                                 |                                |                                |                                 | P   | P<0.0001     | P<0.001 | 0.331               | P<0.0001            | 0.155           | 0.538                         | 0.426                         |
| L5 Tb.Sp,<br>mm  | 0.250                          | 0.244                          | 0.225                          | 0.250                           | 0.243                          | 0.245                          | 0.252                           | 0.329                          | 0.317                          | 0.351                          | 0.364                           | 0.320                          | 0.309                          | 0.347                           | Est | -0.093       | -0.005  | 0.002               | 0.023               | 0.024           | -0.018                        | -0.028                        |
|                  | 0.026                          | 0.027                          | 0.024                          | 0.046                           | 0.022                          | 0.040                          | 0.031                           | 0.043                          | 0.038                          | 0.039                          | 0.060                           | 0.030                          | 0.032                          | 0.044                           | SE  | 0.005        | 0.005   | 0.006               | 0.006               | 0.009           | 0.013                         | 0.011                         |
|                  |                                |                                |                                |                                 |                                |                                |                                 |                                |                                |                                |                                 |                                |                                |                                 | P   | P<0.0001     | 0.313   | 0.729               | P<0.0001            | P<0.05          | 0.161                         | P<0.05                        |
| L5 Tb.N,<br>1/mm | 3.555                          | 3.693                          | 3.699                          | 3.639                           | 3.552                          | 3.369                          | 3.380                           | 2.560                          | 2.615                          | 2.137                          | 2.291                           | 2.610                          | 2.708                          | 2.485                           | Est | 1.068        | -0.016  | -0.148              | -0.166              | -0.463          | 0.082                         | 0.082                         |
|                  | 0.412                          | 0.528                          | 0.448                          | 0.735                           | 0.575                          | 0.659                          | 0.527                           | 0.507                          | 0.548                          | 0.434                          | 0.641                           | 0.429                          | 0.465                          | 0.493                           | SE  | 0.067        | 0.066   | 0.089               | 0.079               | 0.129           | 0.180                         | 0.160                         |
|                  |                                |                                |                                |                                 |                                |                                |                                 |                                |                                |                                |                                 |                                |                                |                                 | P   | P<0.0001     | 0.812   | 0.097               | P<0.05              | P<0.001         | 0.651                         | 0.609                         |
| L5 BMD,<br>g/cc  | 0.247                          | 0.241                          | 0.230                          | 0.257                           | 0.225                          | 0.230                          | 0.249                           | 0.207                          | 0.203                          | 0.165                          | 0.194                           | 0.210                          | 0.218                          | 0.219                           | Est | 0.037        | 0.009   | -0.009              | 0.010               | -0.032          | 0.011                         | 0.018                         |
|                  | 0.028                          | 0.041                          | 0.033                          | 0.055                           | 0.038                          | 0.056                          | 0.040                           | 0.043                          | 0.047                          | 0.040                          | 0.058                           | 0.037                          | 0.060                          | 0.046                           | SE  | 0.006        | 0.006   | 0.007               | 0.007               | 0.011           | 0.015                         | 0.013                         |
|                  |                                |                                |                                |                                 |                                |                                |                                 |                                |                                |                                |                                 |                                |                                |                                 | P   | P<0.0001     | 0.0888  | 0.212               | 0.150               | P<0.01          | 0.463                         | 0.180                         |

**Supplementary Table 7: Trabecular bone morphology of the axial skeleton (lumbar vertebra-5) by micro-CT.** Trabecular bone parameters were taken from the vertebral body. Images were acquired utilizing a SkyScan 1172 high-resolution scanner (MicroPhotonics), using a 10 MP digital detector, 10W power energy (60 KV and 167 mA), and a 0.5 mm aluminum filter with 9.7 µm image voxel size. Descriptive statistics (means (top number), standard deviations (bottom number)) were computed for each outcome. Statistical significance for main effects of sex and treatment (Tx) was determined through comparisons to the Bonferroni-adjusted significance level (.0004). Bone volume per total volume (BV/TV), trabecular number (Tb.N), bone mineral density (BMD), trabecular spacing (Tb.Sp), trabecular thickness (Tb.Th). Estimated value (Est), standard Error (SE), p value (P).
